# Supplementary material
Source: PubMed Central journal article supplement (PMC5624512)

# Supplemental Figure 9

## Figure 1A

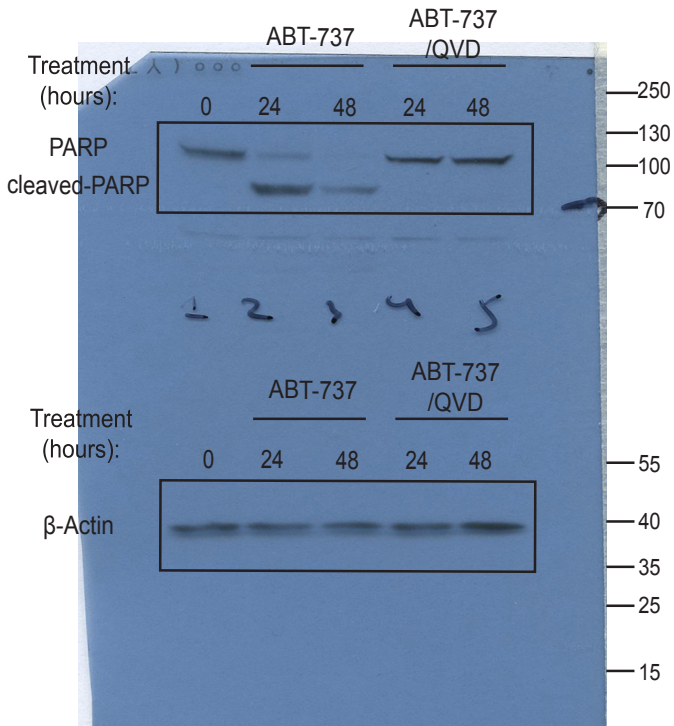

## Figure 1G

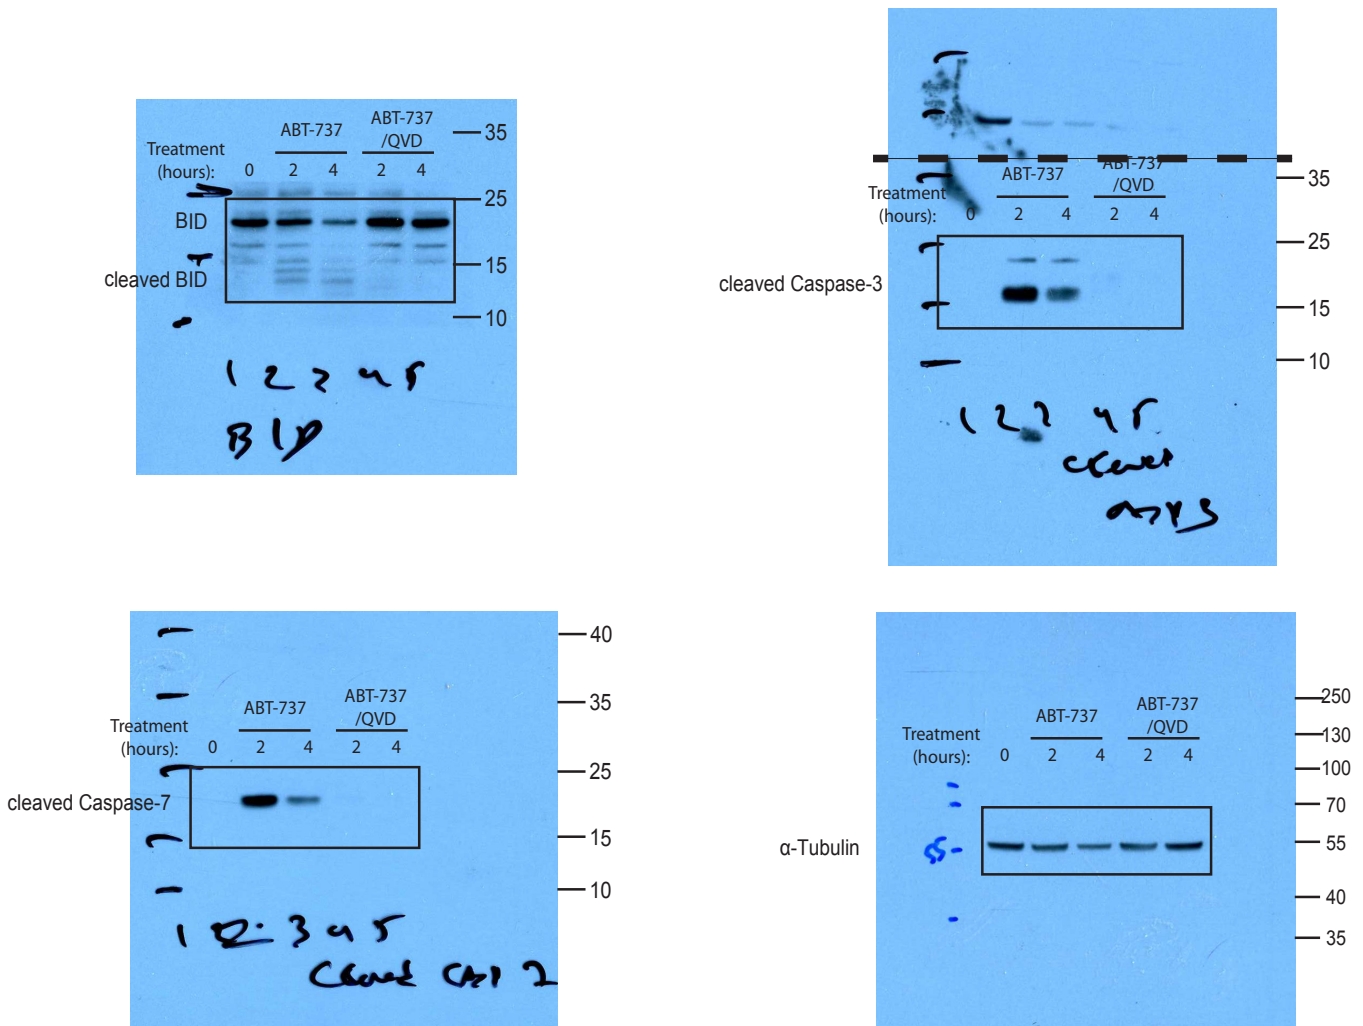

Figure 3E

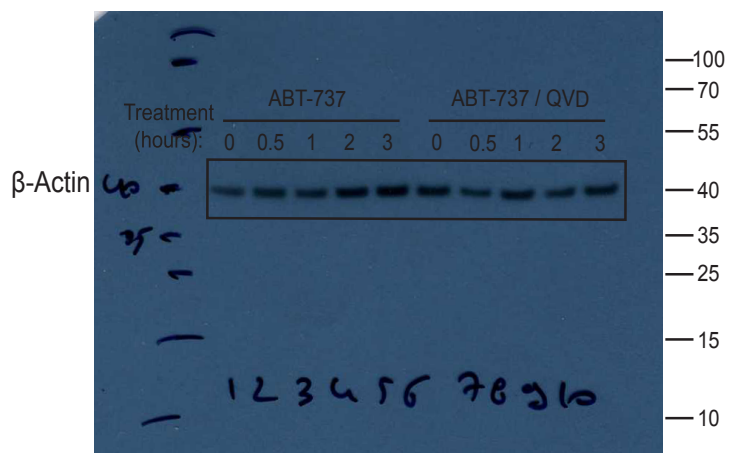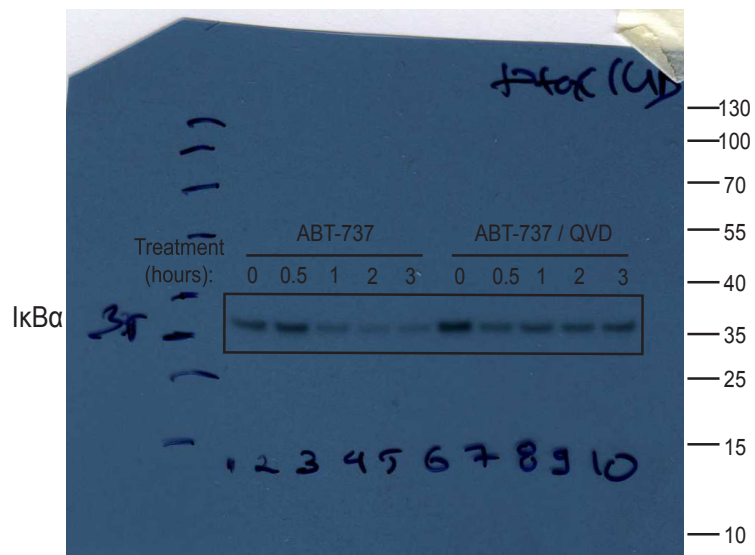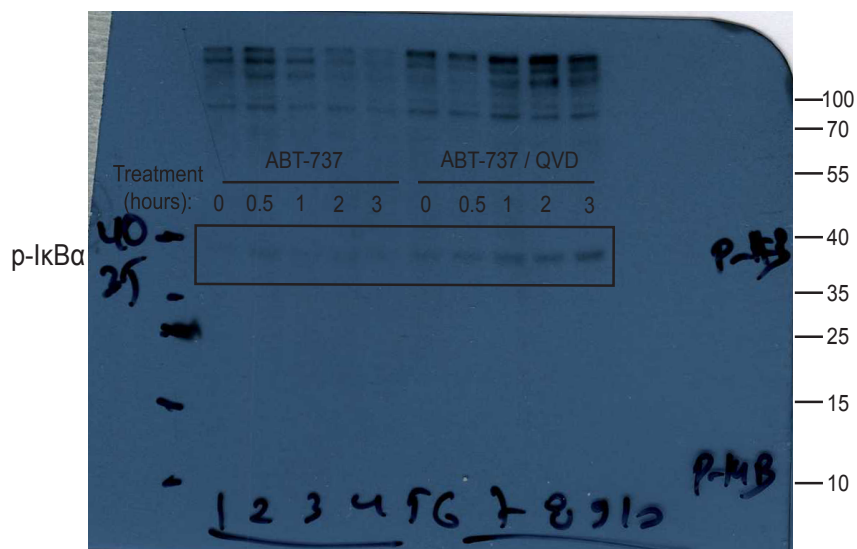



**Figure 4A**

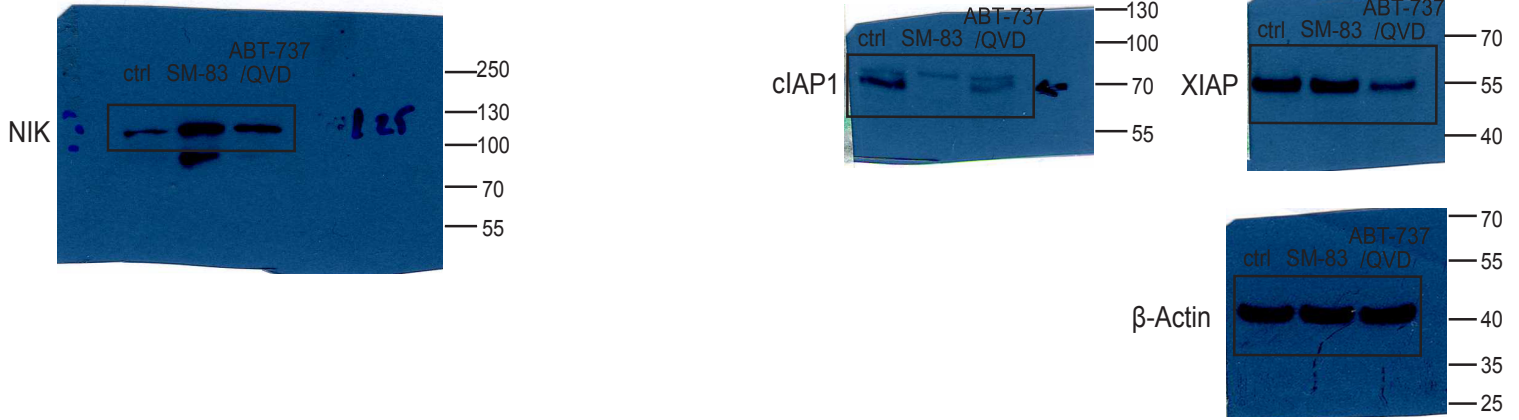

**Figure 4B**

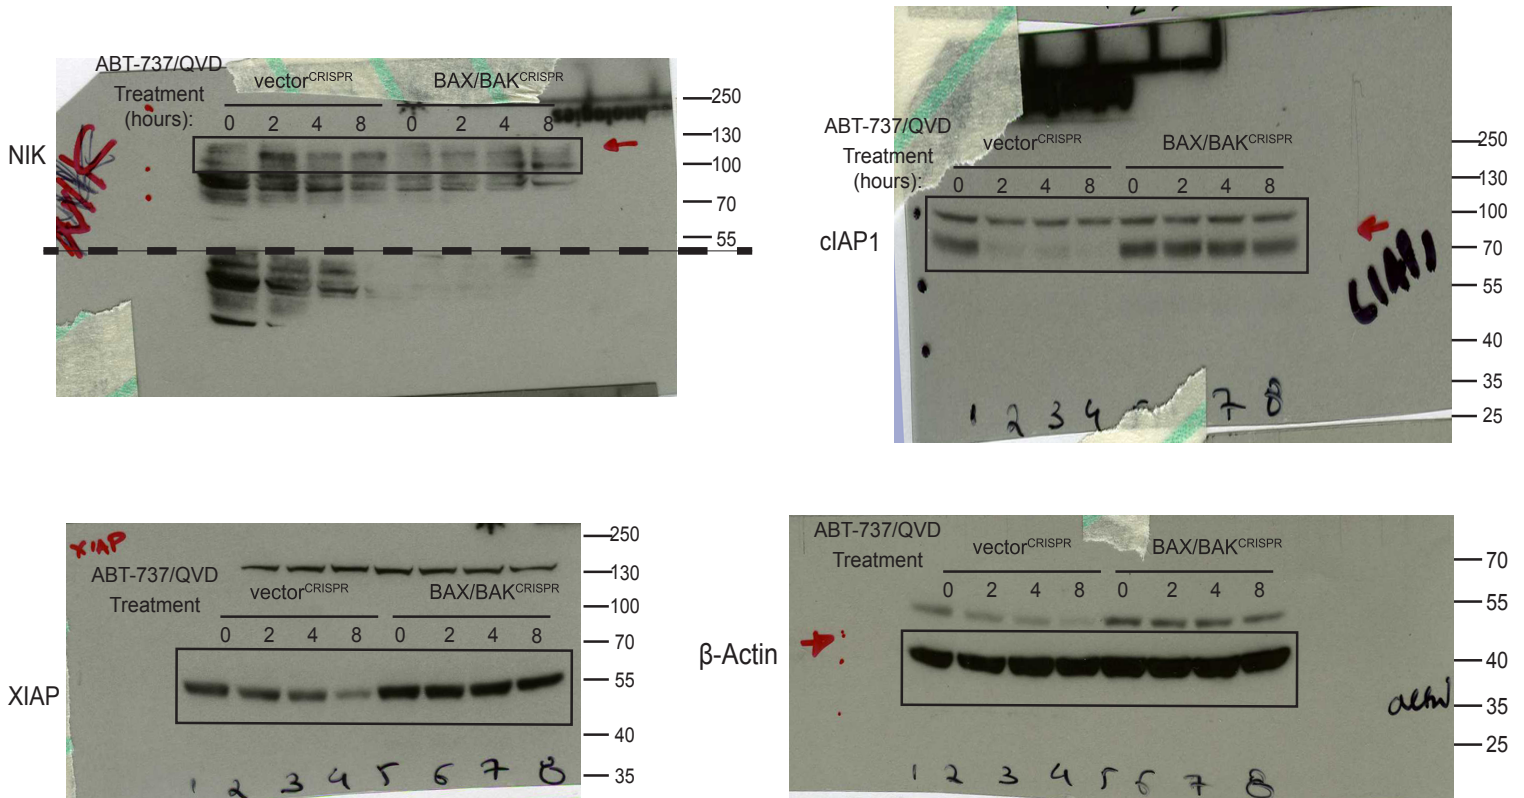

**Figure 4E**

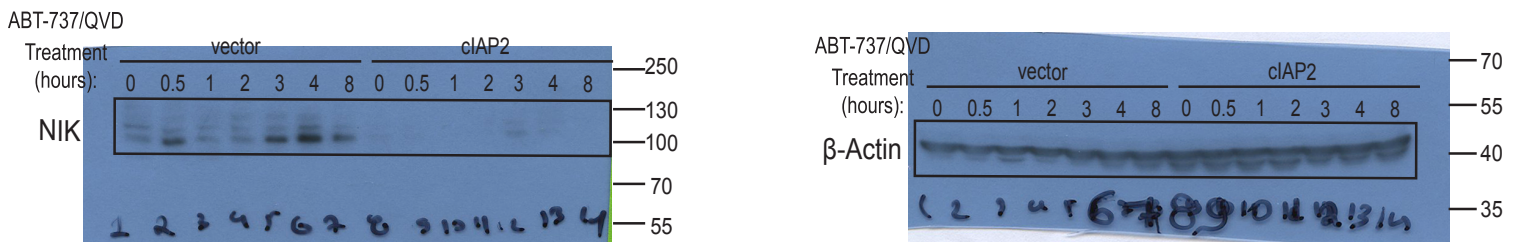

**Figure 4F**

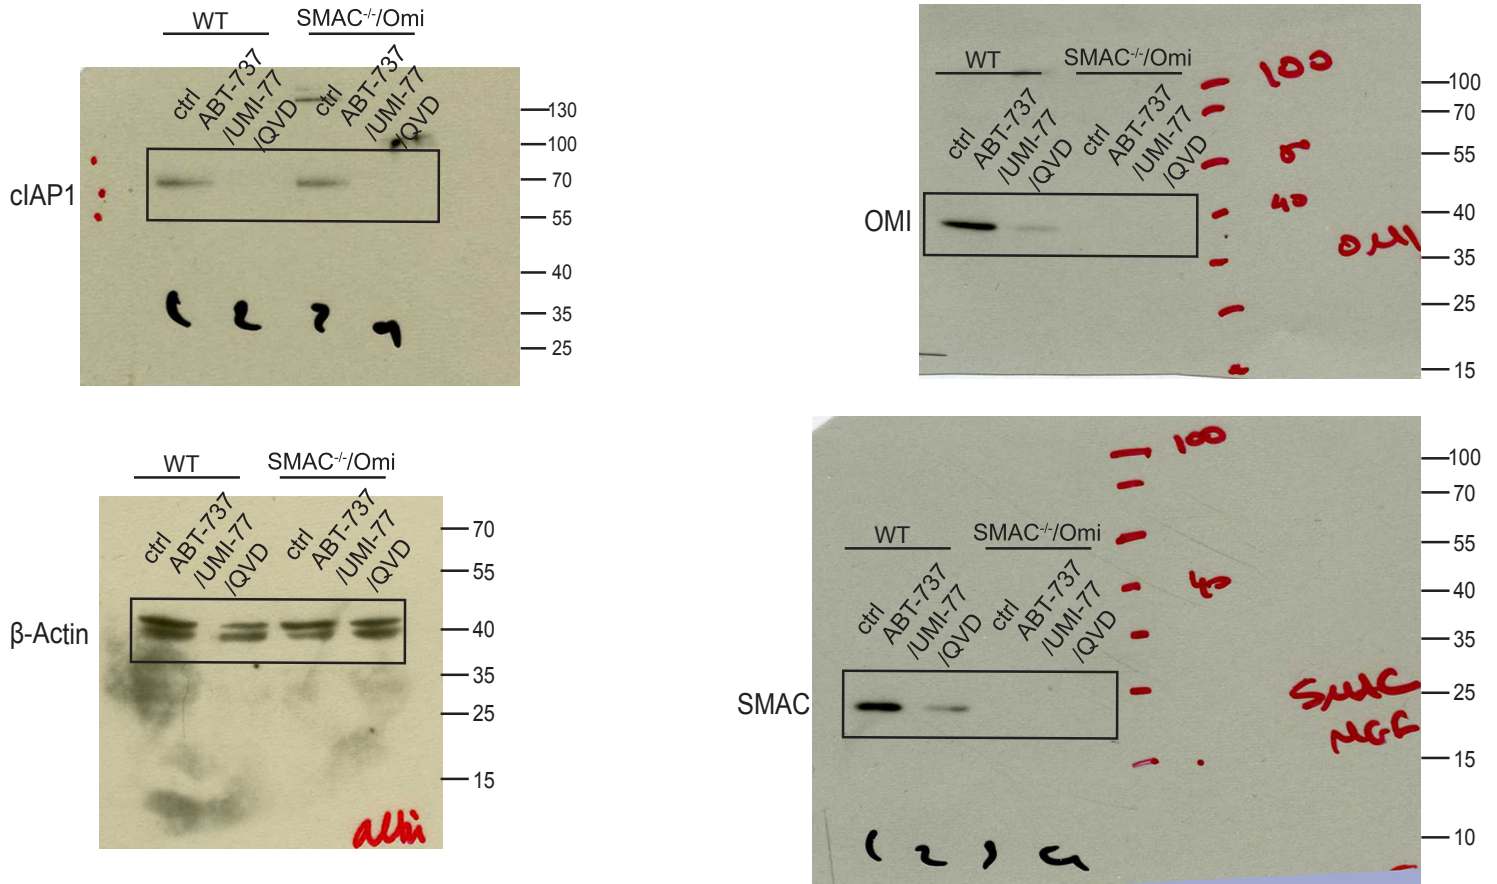

**Figure 4H**

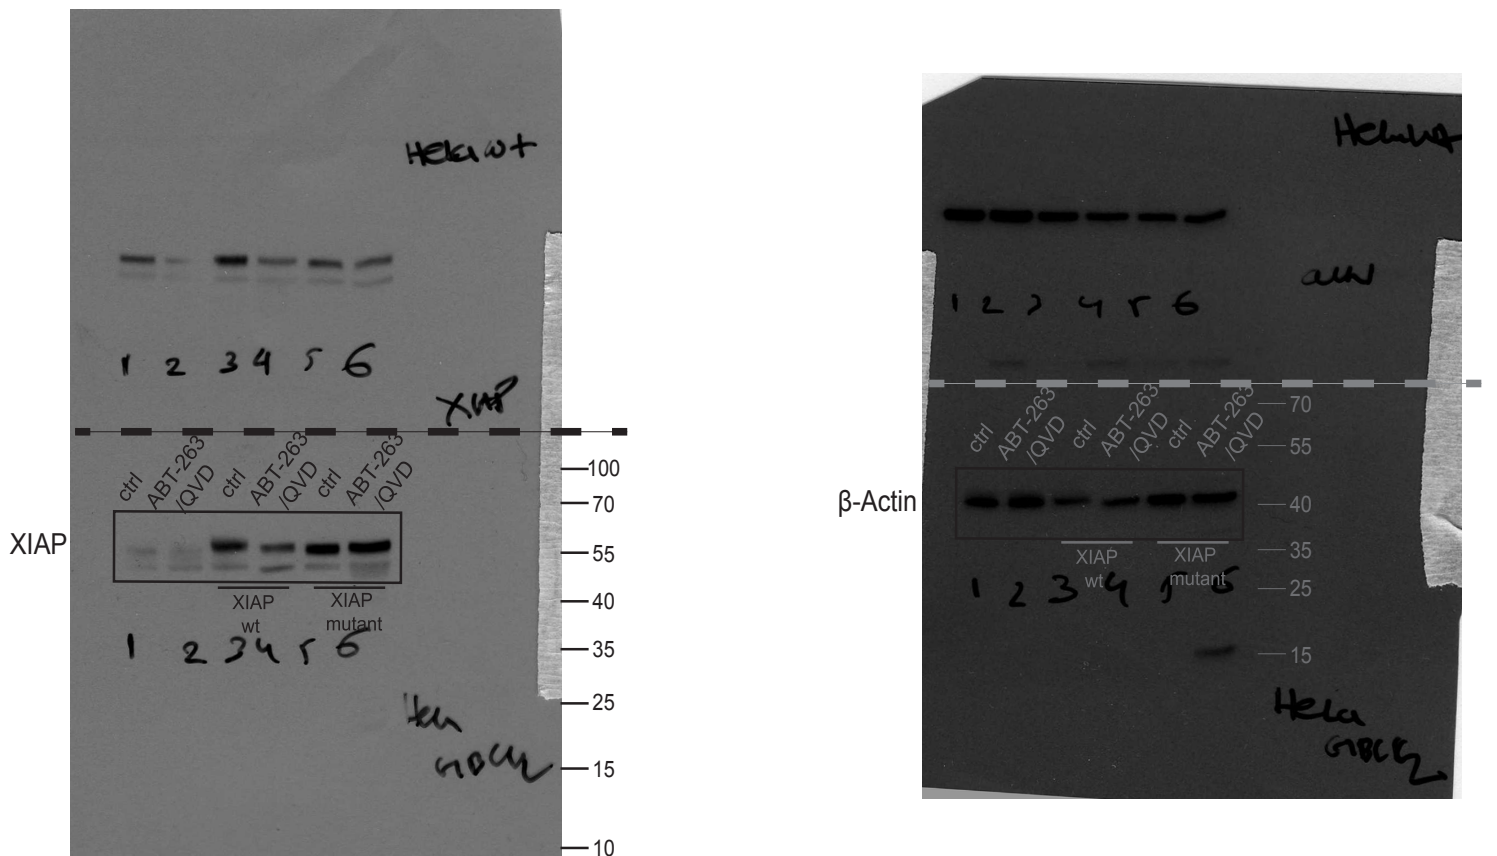



**Figure 5F**

ABT-737/QVD

Treatment (hours):

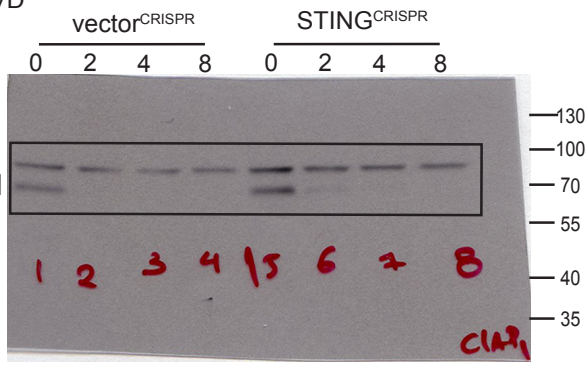

ABT-737/QVD

Treatment (hours):

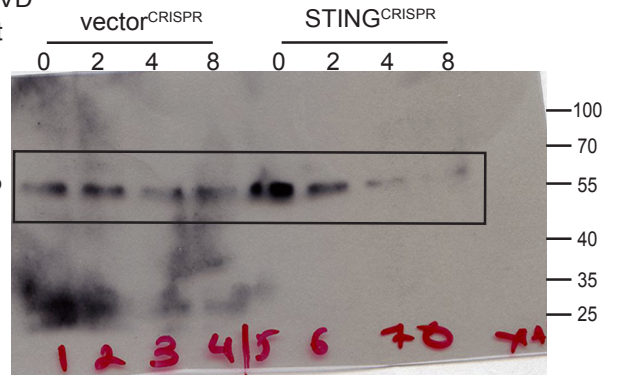

ABT-737/QVD

Treatment (hours):

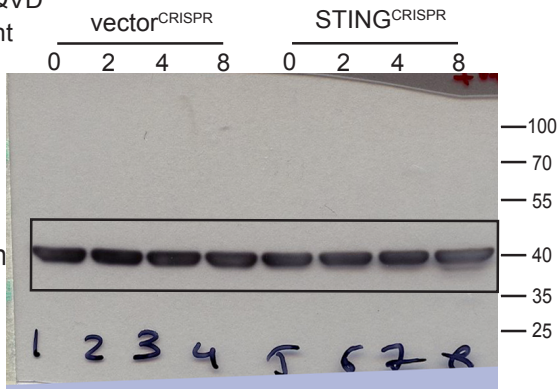

ABT-737/QVD

Treatment (hours):

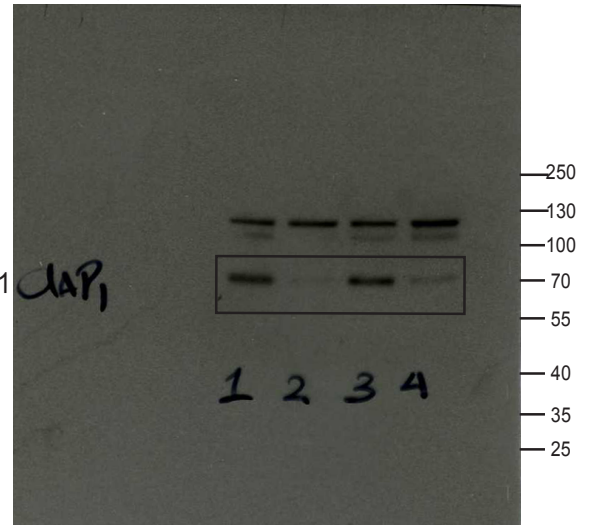

ABT-737/QVD

Treatment (hours):

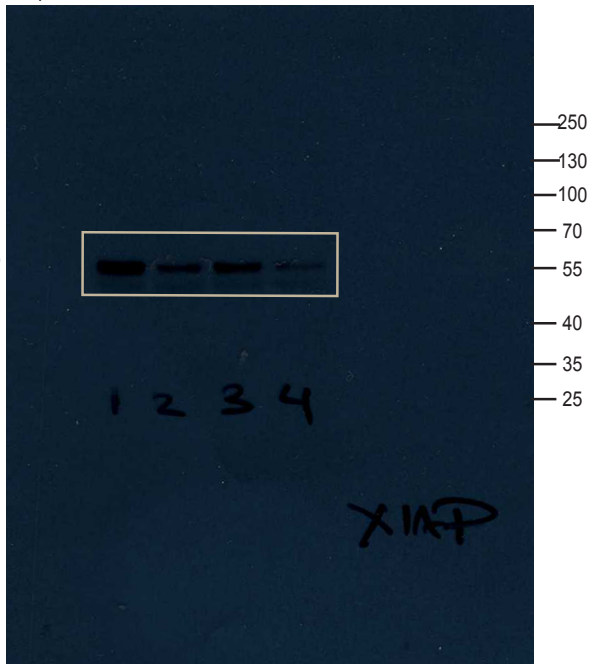

ABT-737/QVD

Treatment (hours):

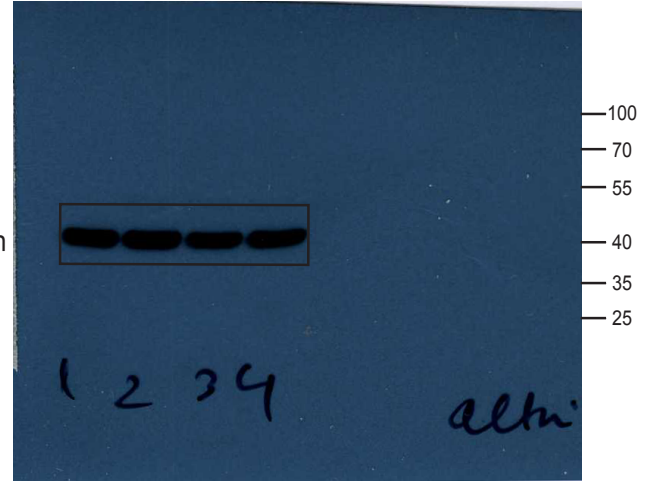

**Supplemental Figure 1A**

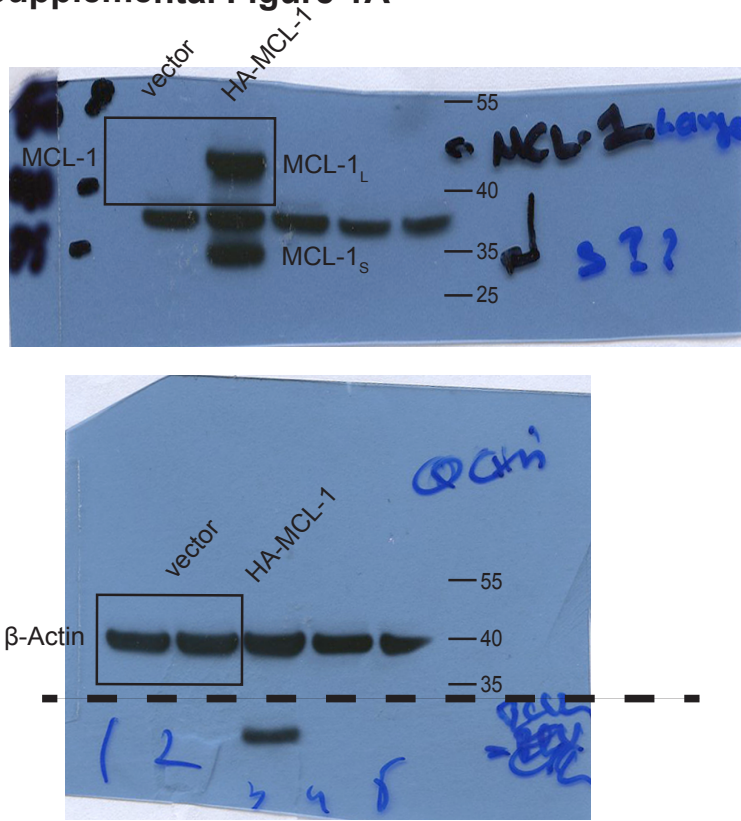

**Supplemental Figure 1D**

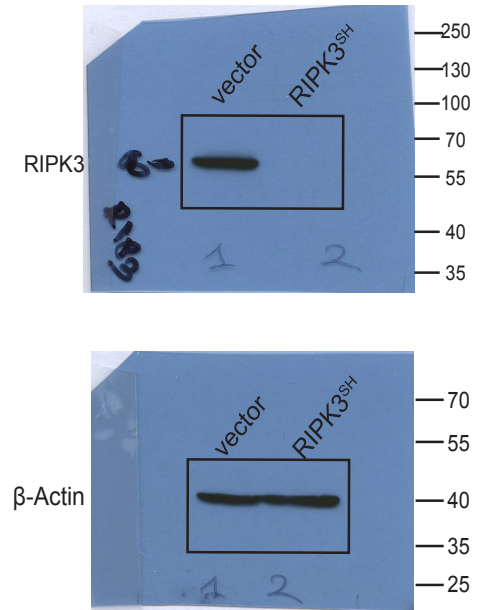

**Supplemental Figure 1E**

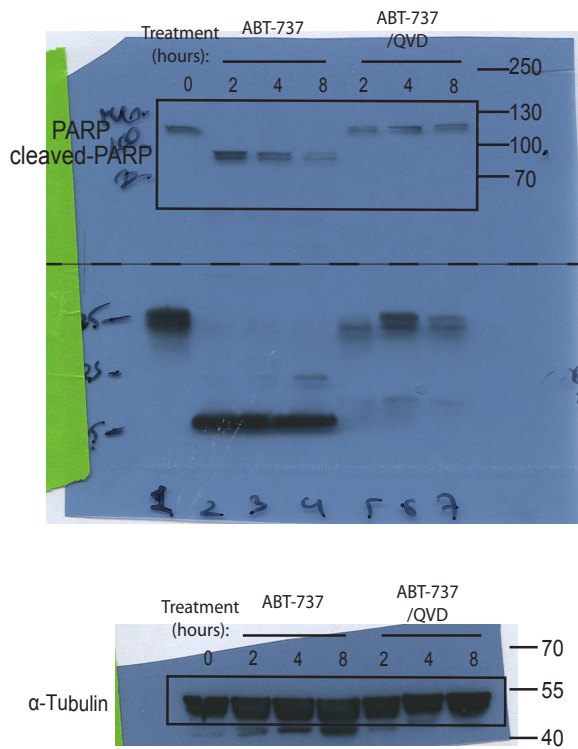

**Supplemental Figure 1F**

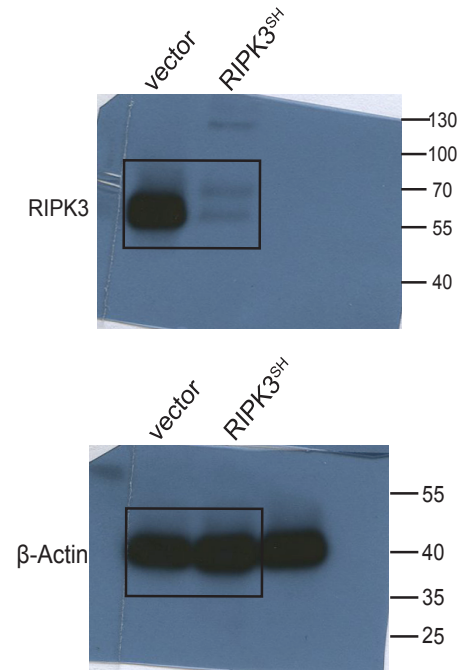



### Supplemental Figure 1H

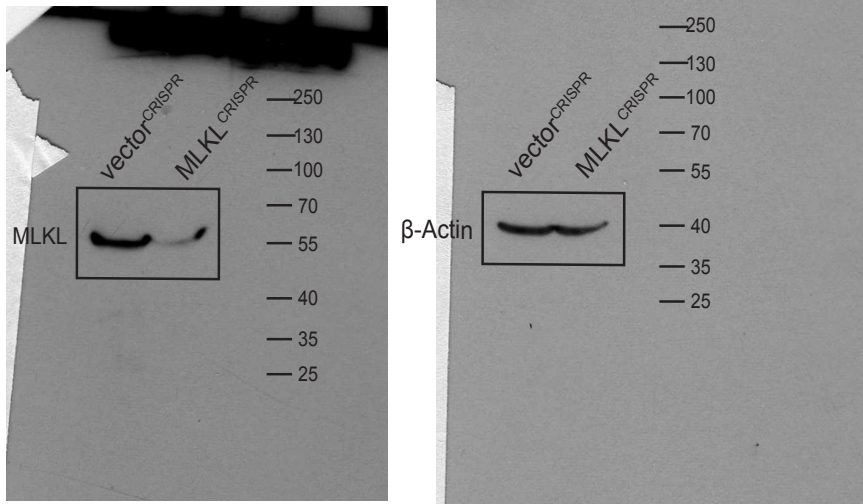

### Supplemental Figure 1I

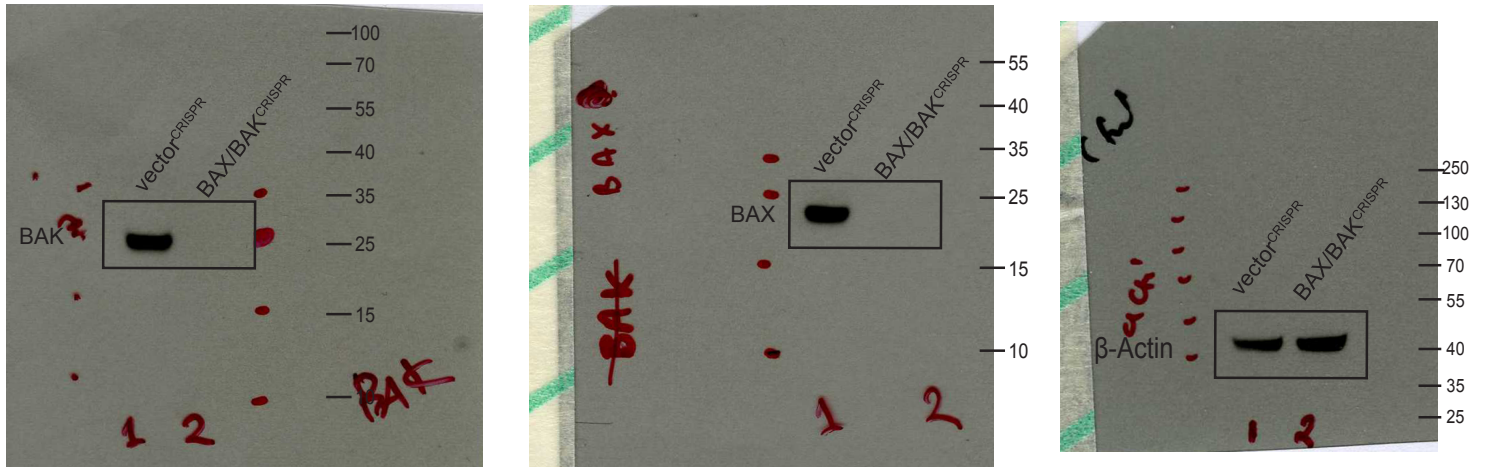

### Supplemental Figure 1J

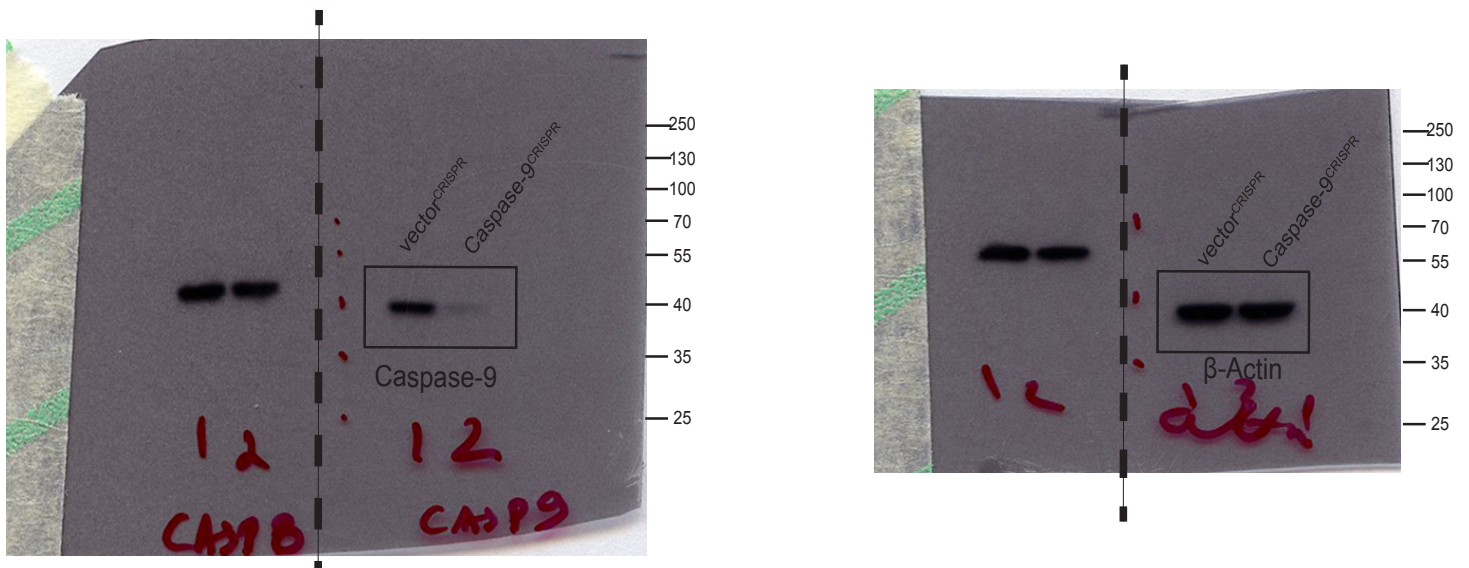

Supplemental Figure 2D

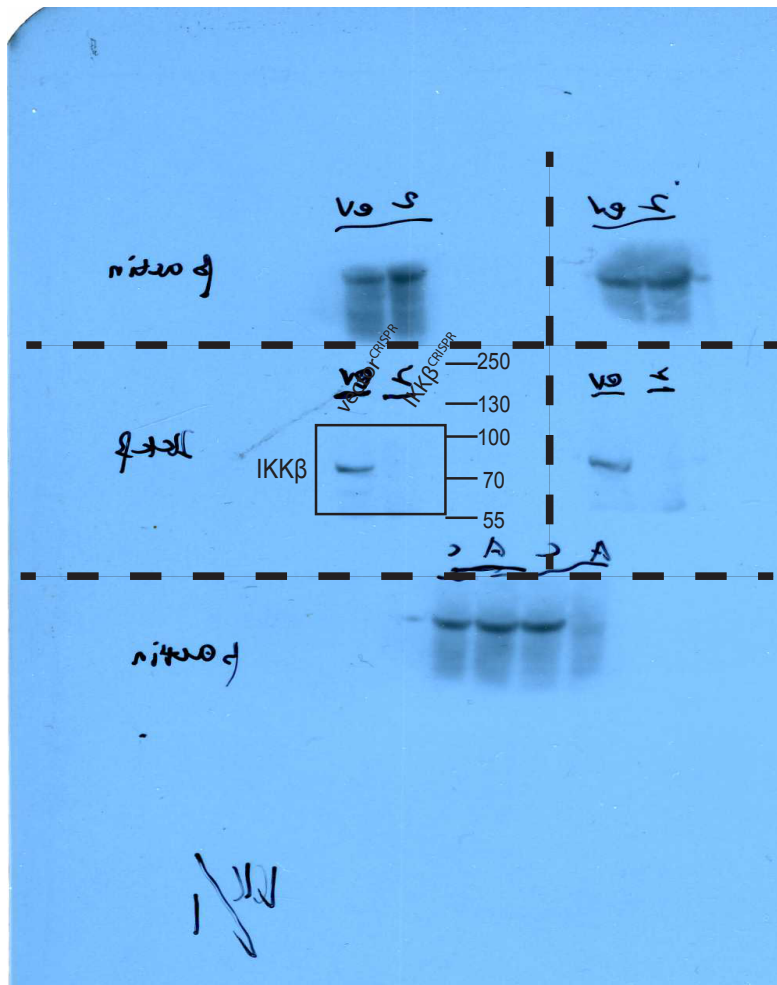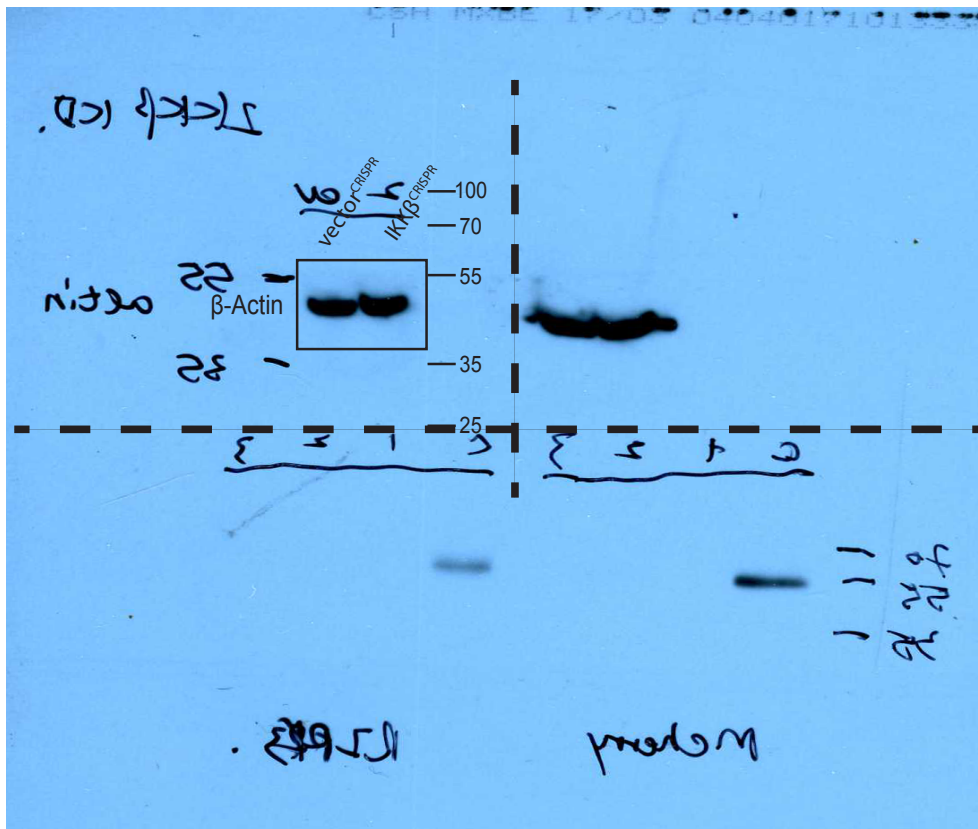

Supplemental Figure 2D

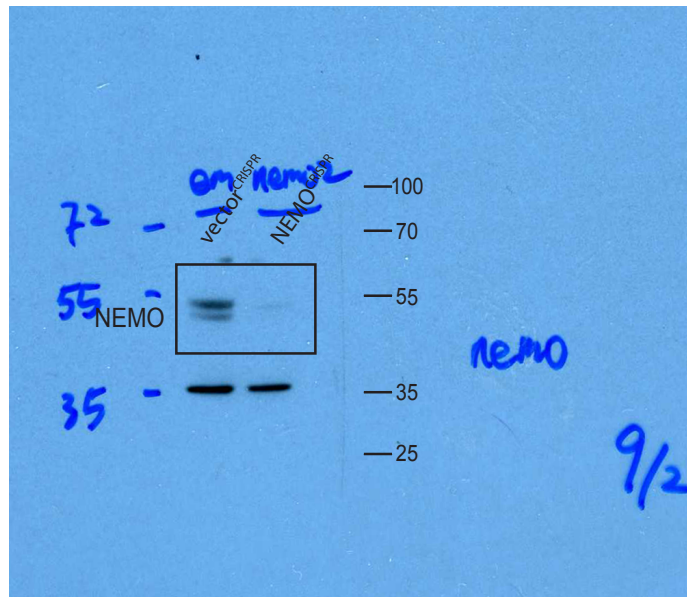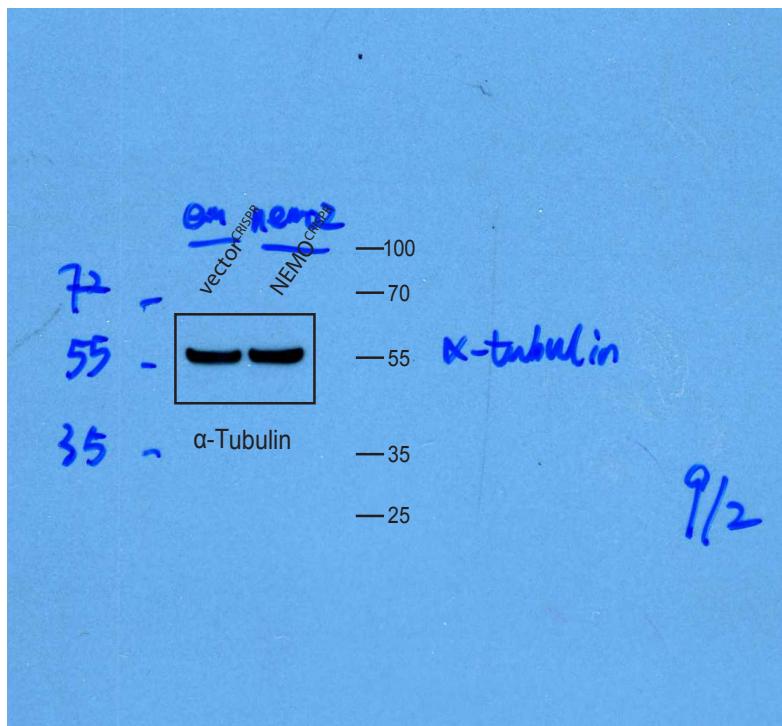



### Supplemental Figure 3B

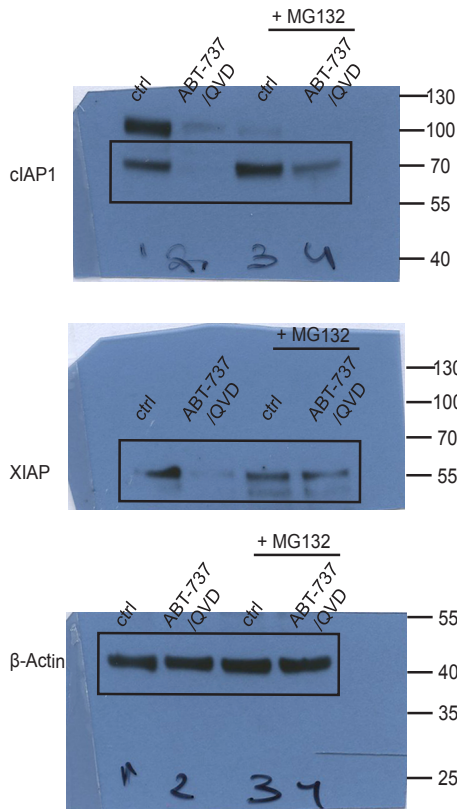

### Supplemental Figure 3C

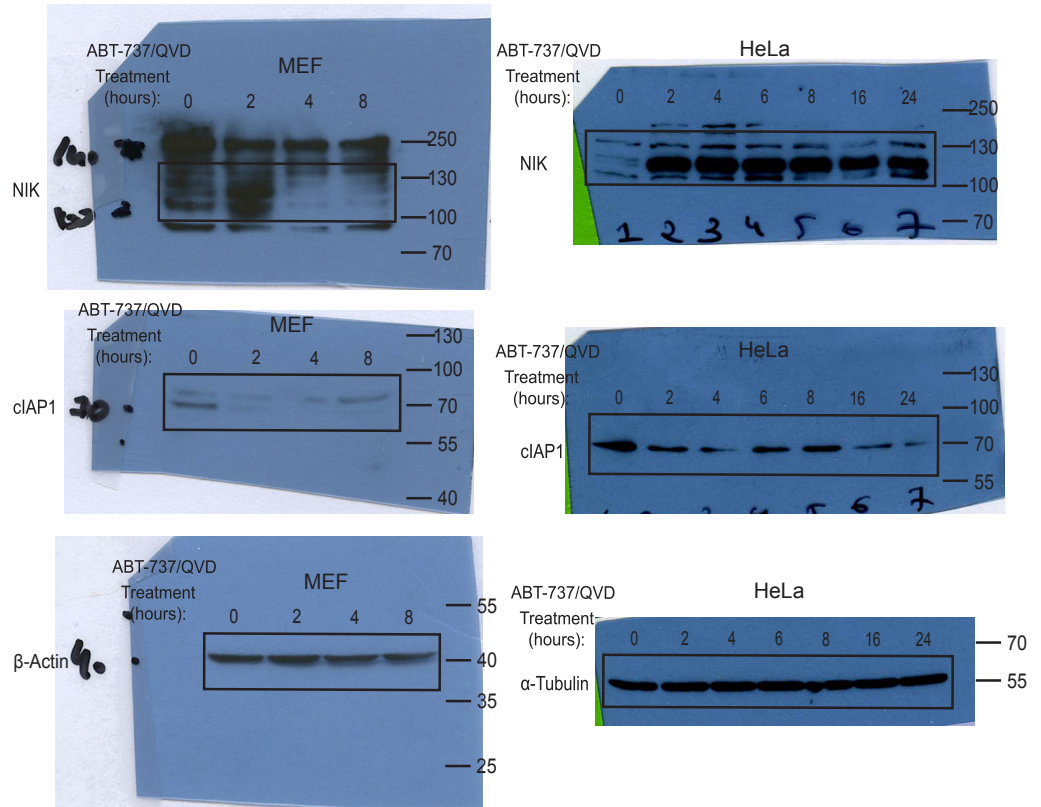

### Supplemental Figure 3D

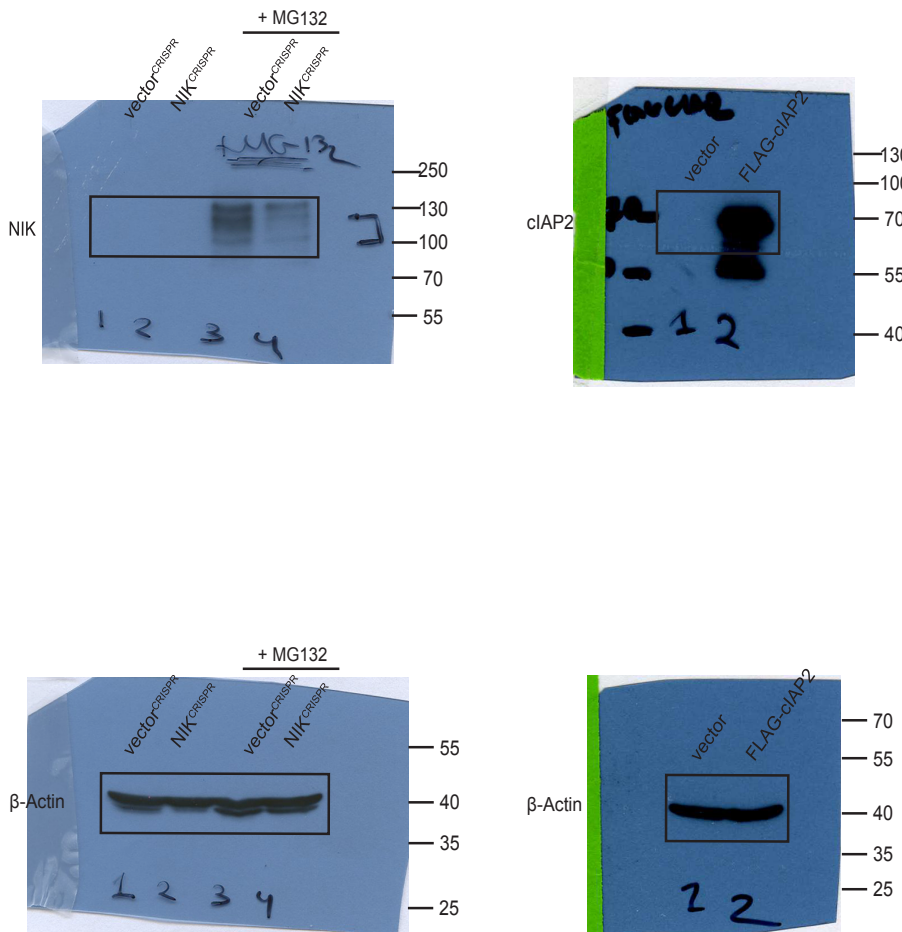

### Supplemental Figure 3E

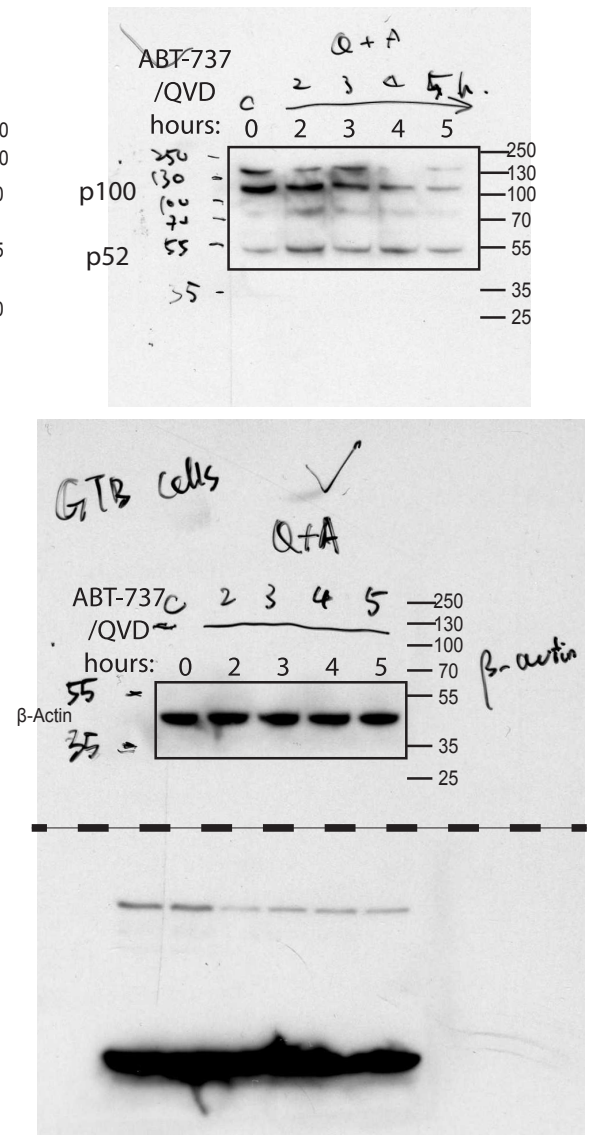



### Supplemental Figure 3H

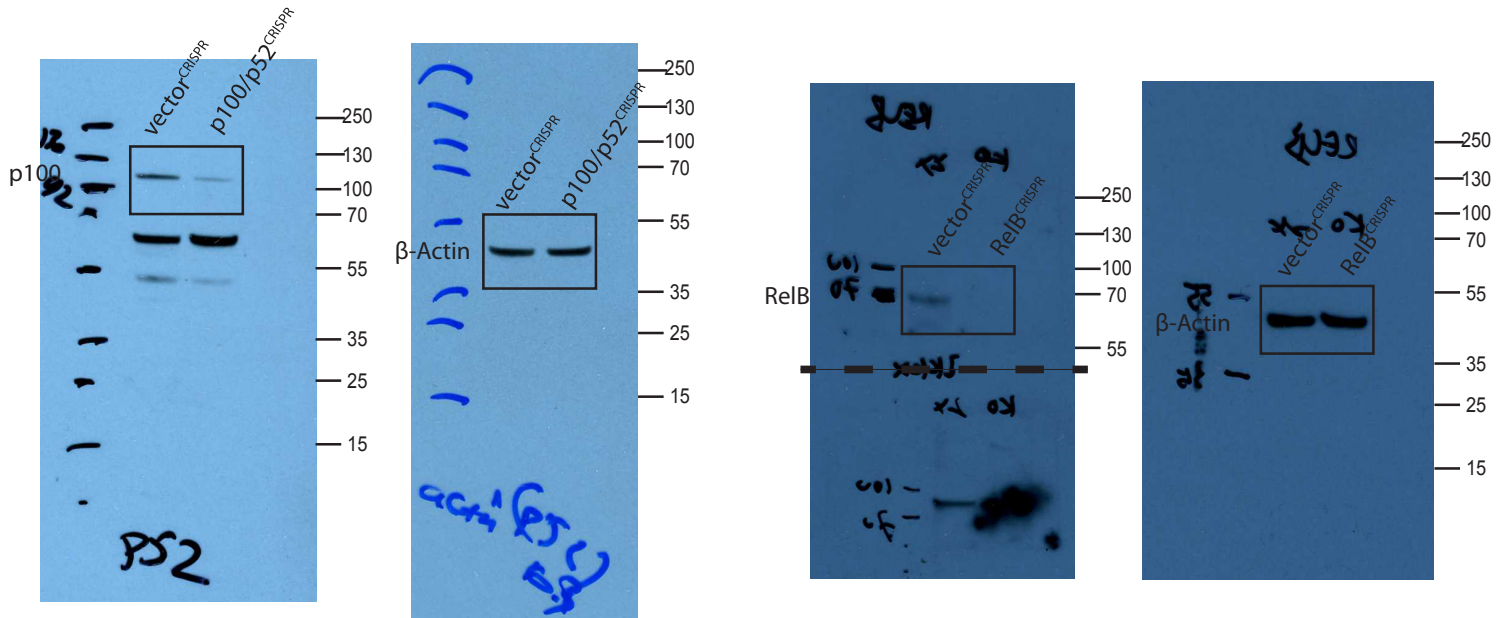

### Supplemental Figure 3K

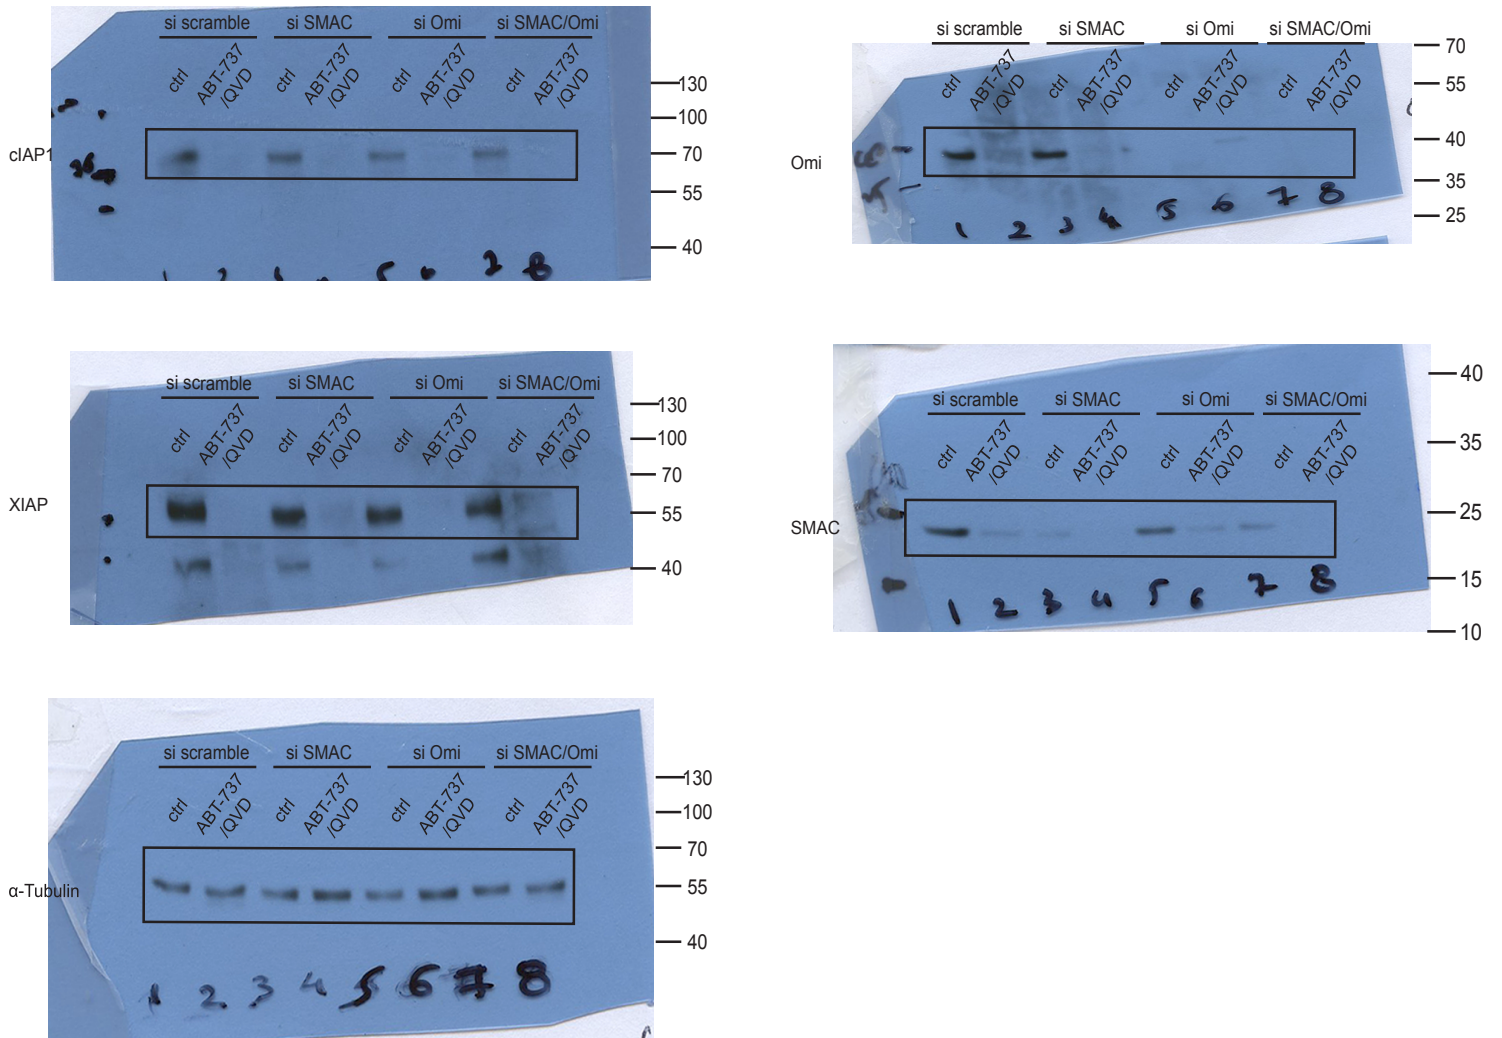

Supplemental Figure 4E

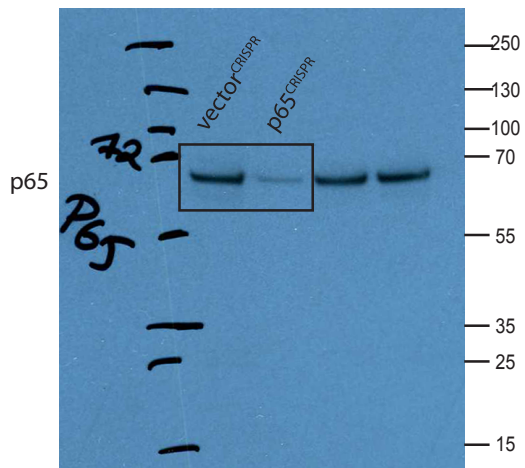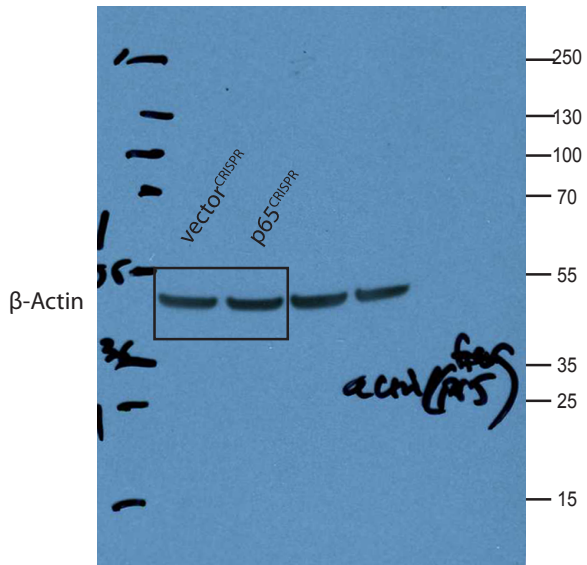

Supplemental Figure 4I

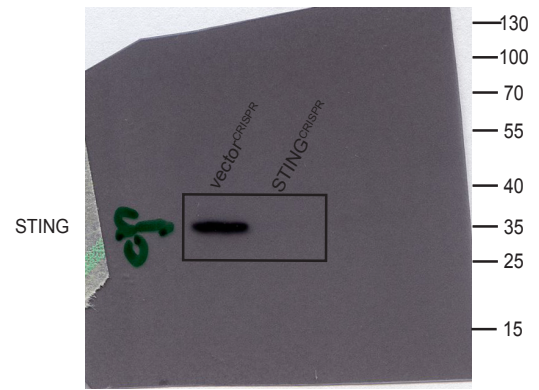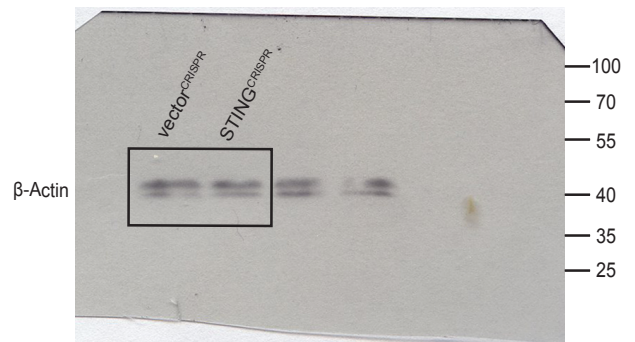

# Supplemental Figure 6A

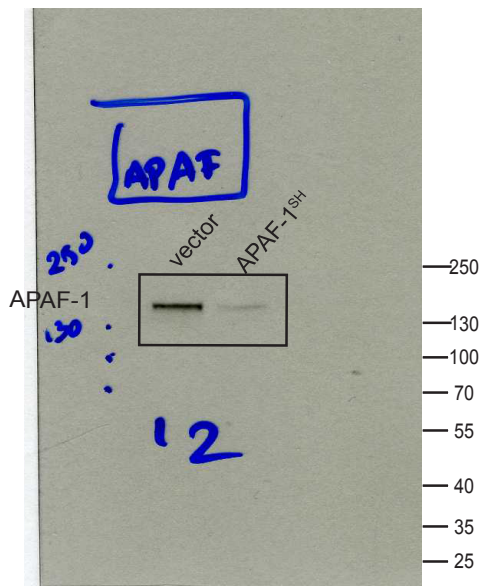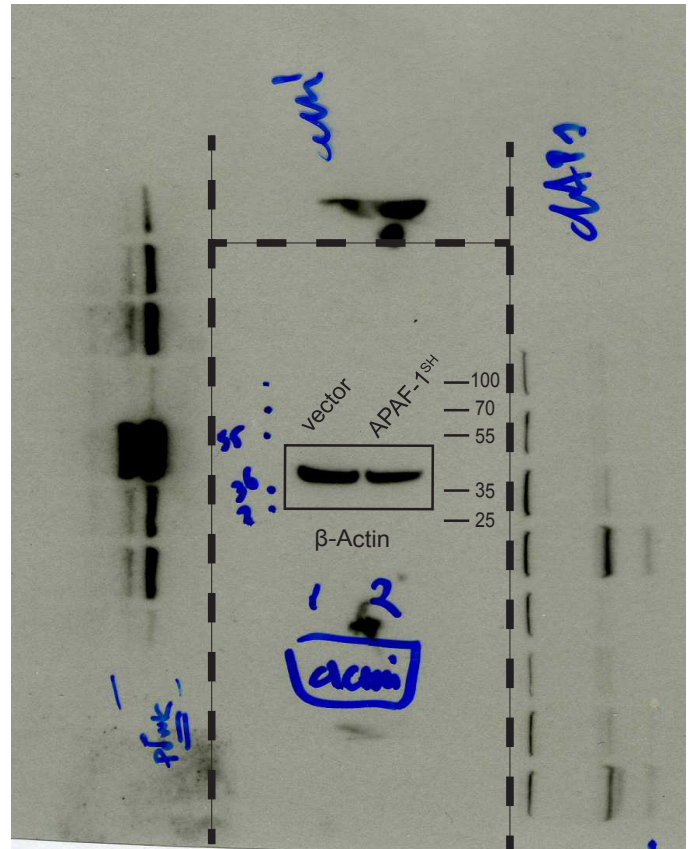

# Supplemental Figure 7H

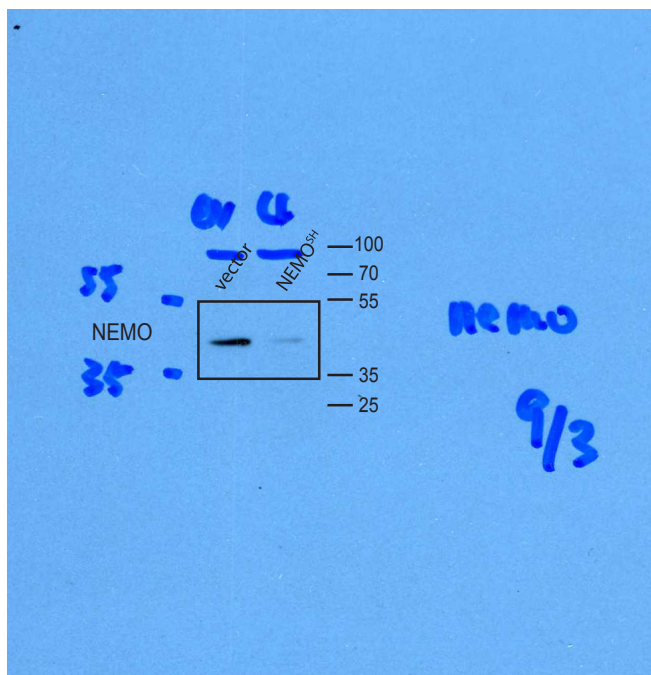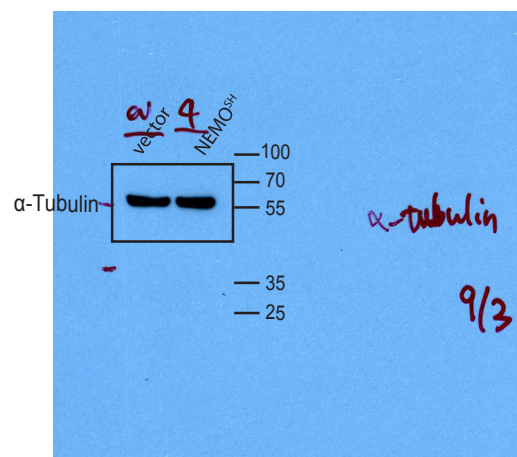

Supplement: NIHMS73487-supplement-Supplementary_figure_9.pdf [file NIHMS73487-supplement-Supplementary_figure_9.pdf]
