# Supplementary material
Source: PubMed Central journal article supplement (PMC5624512)
Supplement: NIHMS73487-supplement-Supplementary_figure_7.pdf [file NIHMS73487-supplement-Supplementary_figure_7.pdf]

# Supplemental Figure 7

**A.**

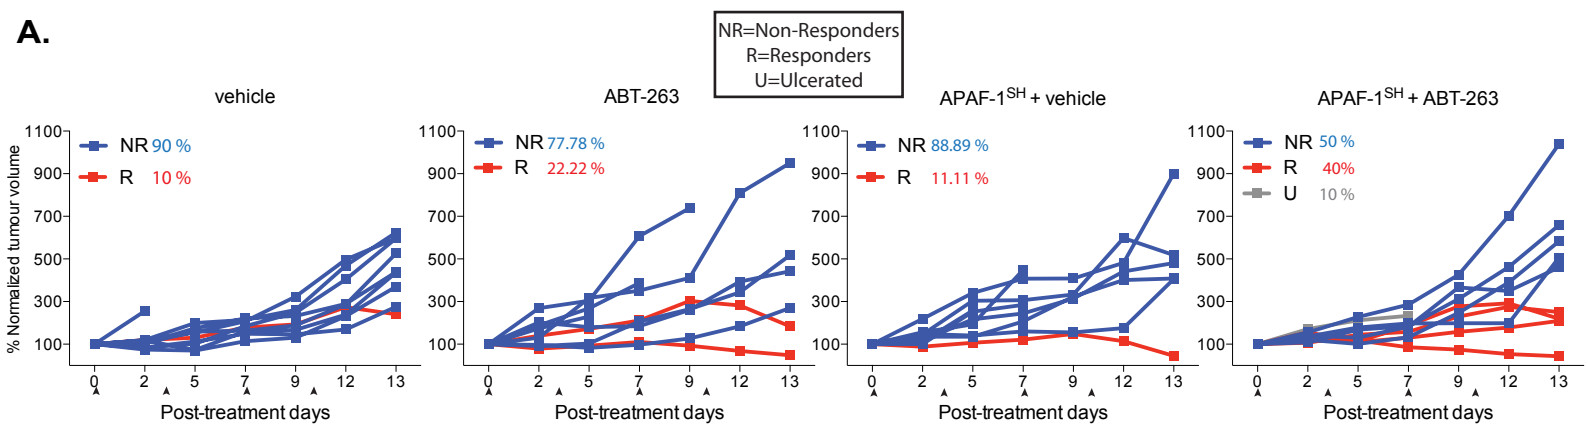

**B.**

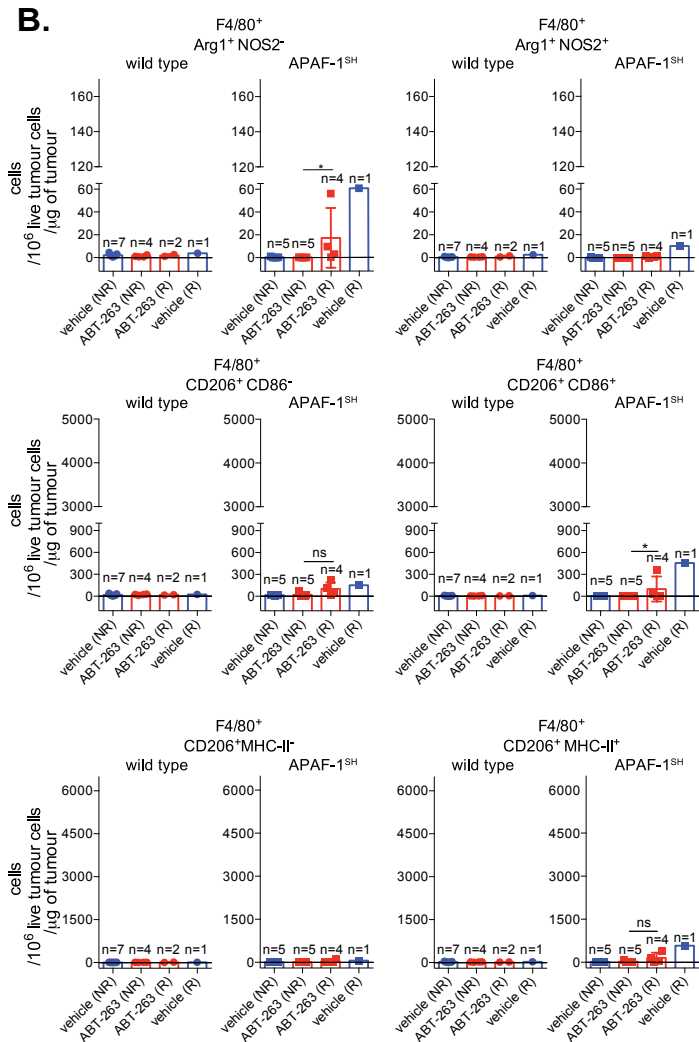

**C.**

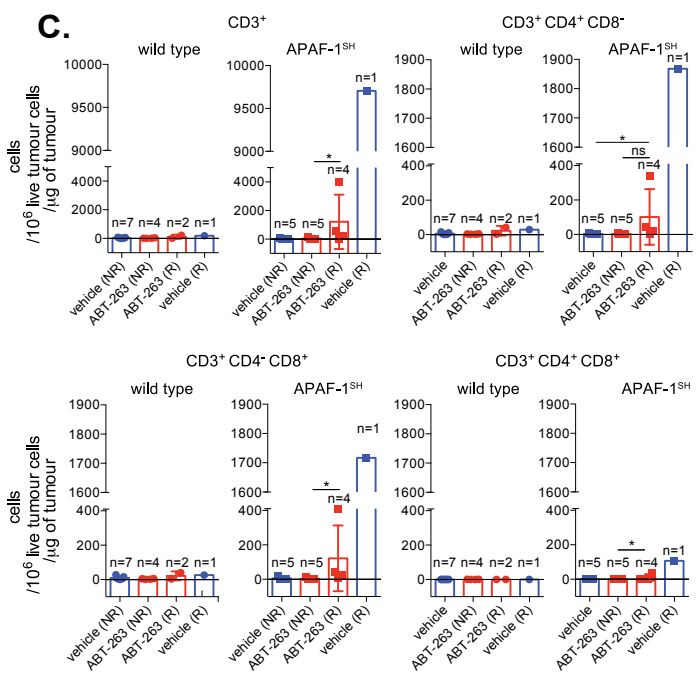

**D.**

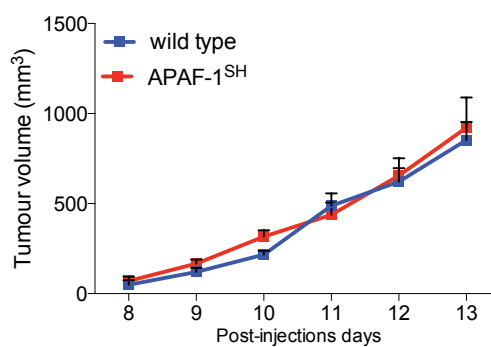

**E.**

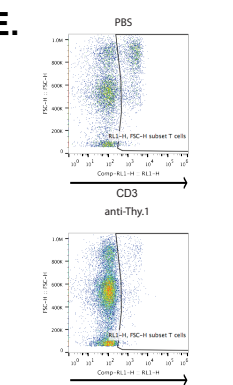

**F.**

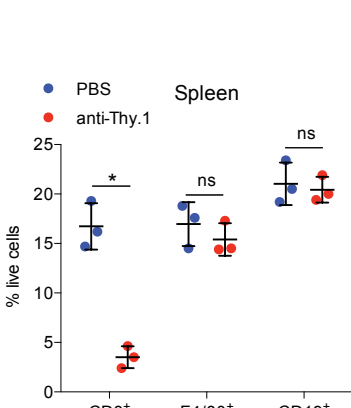

**G.**

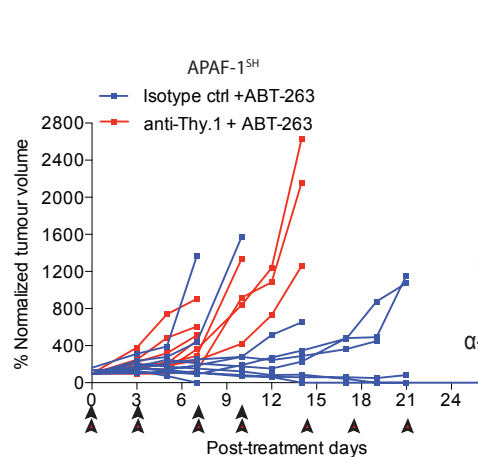

**H.**

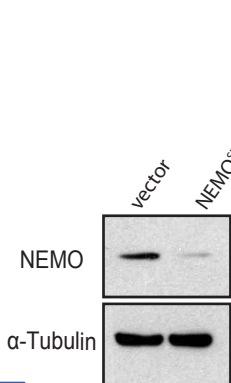

**I.**

| 12 Days post-treatment                            | Mice with tumours | Mice without tumours | Chi-Square (two-tailed) |
|---------------------------------------------------|-------------------|----------------------|-------------------------|
| APAF-1 <sup>SH</sup> vector + vehicle             | 8                 | 1                    | P value 0.3311          |
| APAF-1 <sup>SH</sup> NEMO <sup>SH</sup> + vehicle | 8                 | 0                    |                         |
| 12 Days post-treatment                            | Mice with tumours | Mice without tumours | Chi-Square (two-tailed) |
| APAF-1 <sup>SH</sup> vector + ABT-263             | 5                 | 5                    | P value 0.0186 *        |
| APAF-1 <sup>SH</sup> NEMO <sup>SH</sup> + ABT-263 | 8                 | 0                    |                         |
