# Supplementary material
Source: PubMed Central journal article supplement (PMC5624512)
Supplement: NIHMS73487-supplement-Supplementary_figure_8.pdf [file NIHMS73487-supplement-Supplementary_figure_8.pdf]

## Supplemental Figure 8

### FACS Gating Strategy 1: Cell death (PI<sup>+</sup>)

FACSCalibur (BD Biosciences, San Jose, CA)

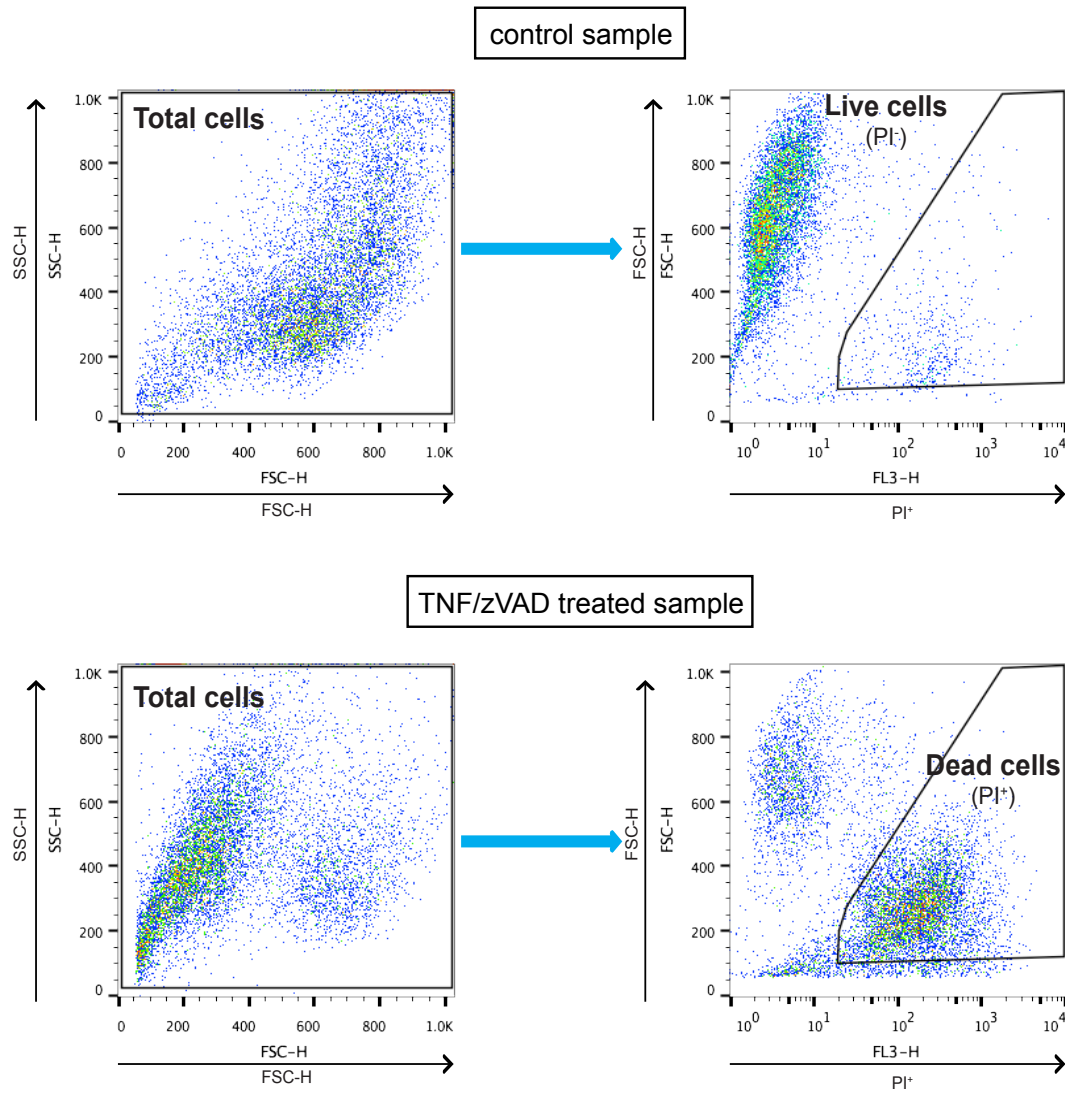

Figures: 1B-E, 2A

# FACS Gating Strategy 2: BMDMs M1/M2 polarization *in vitro*

FACSCalibur (BD Biosciences, San Jose, CA)

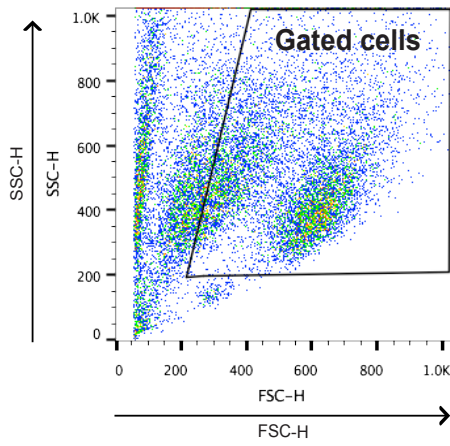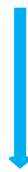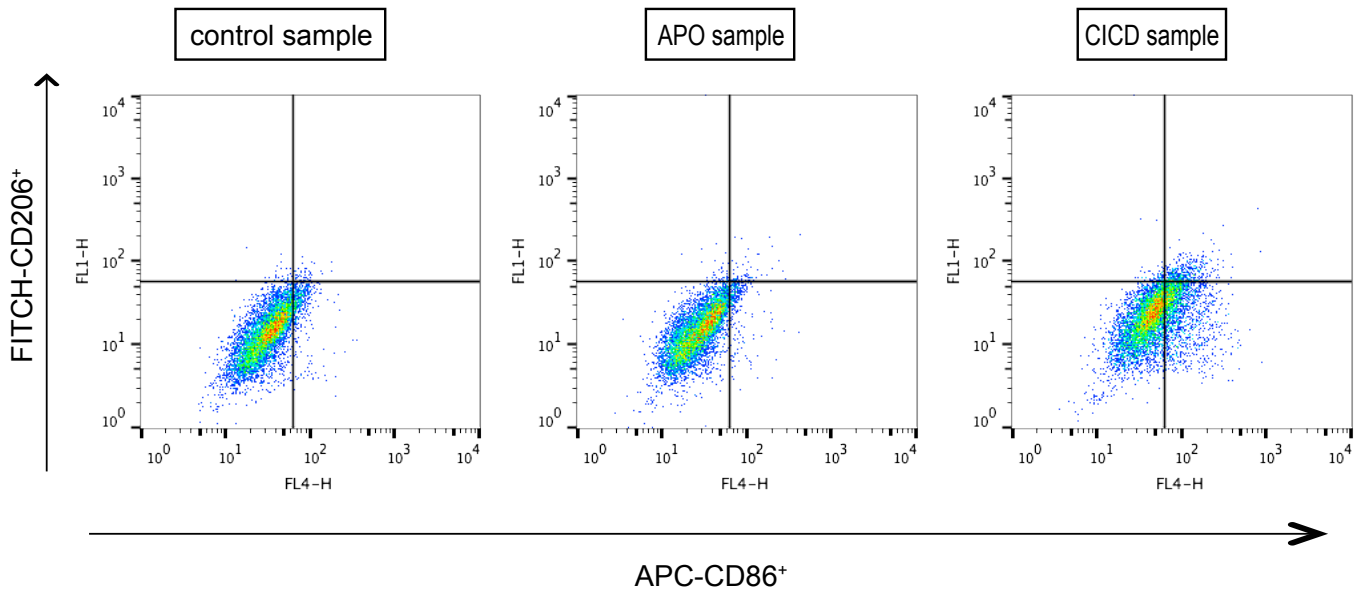

Figures: 6B, 6G, S5A, S5B, S5C

**FACS Gating Strategy 3: Macrophage *in vivo* tumour infiltration and polarization**  
BD FACSVers (BD Biosciences, USA)

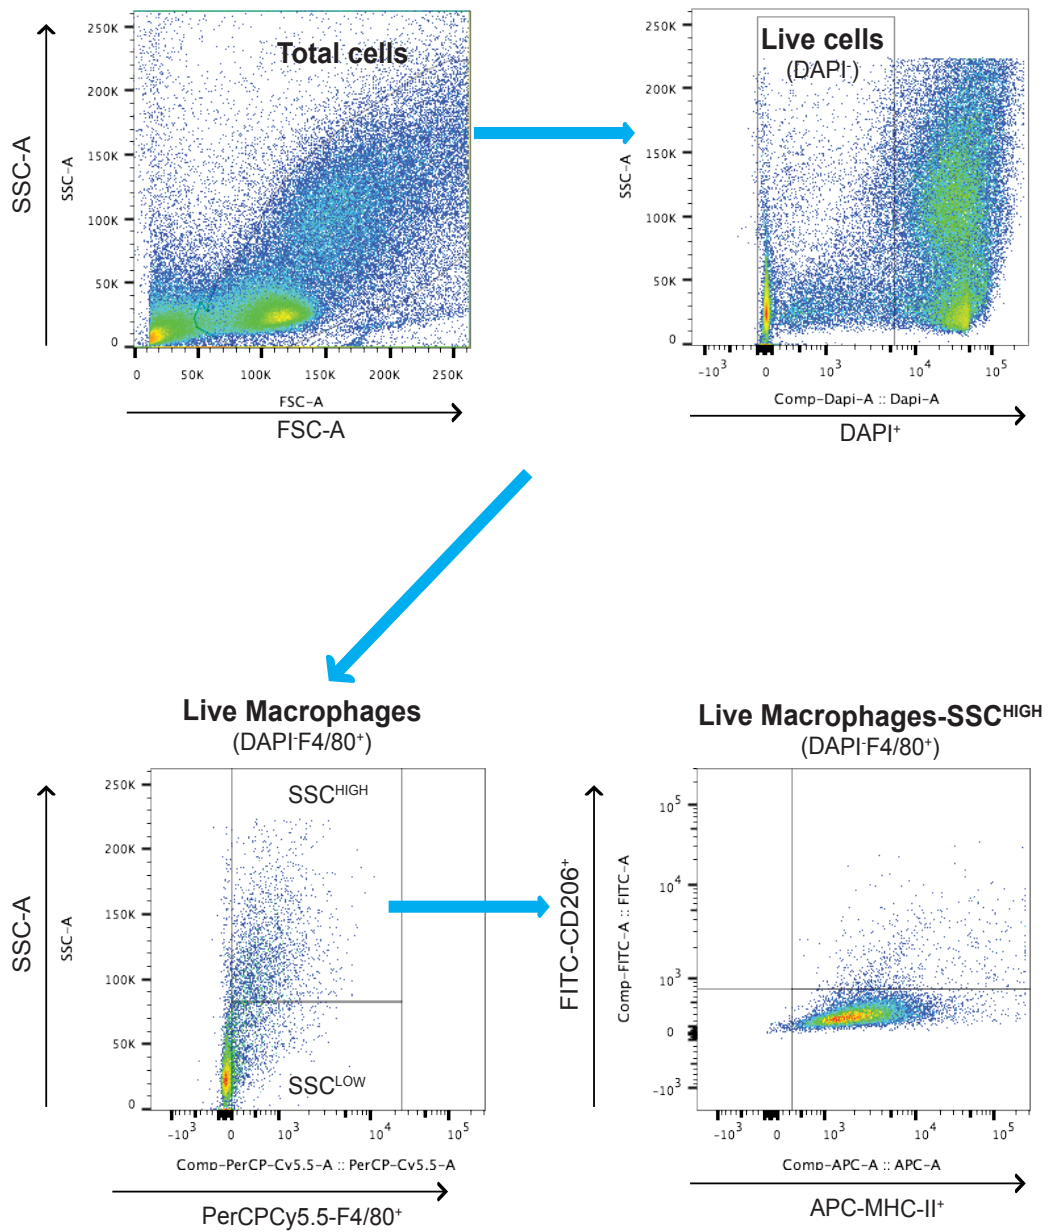

Figures: S6E, S6H

**FACS Gating Strategy 4: T cell *in vivo* tumour infiltration**  
BD FACSVers (BD Biosciences, USA)

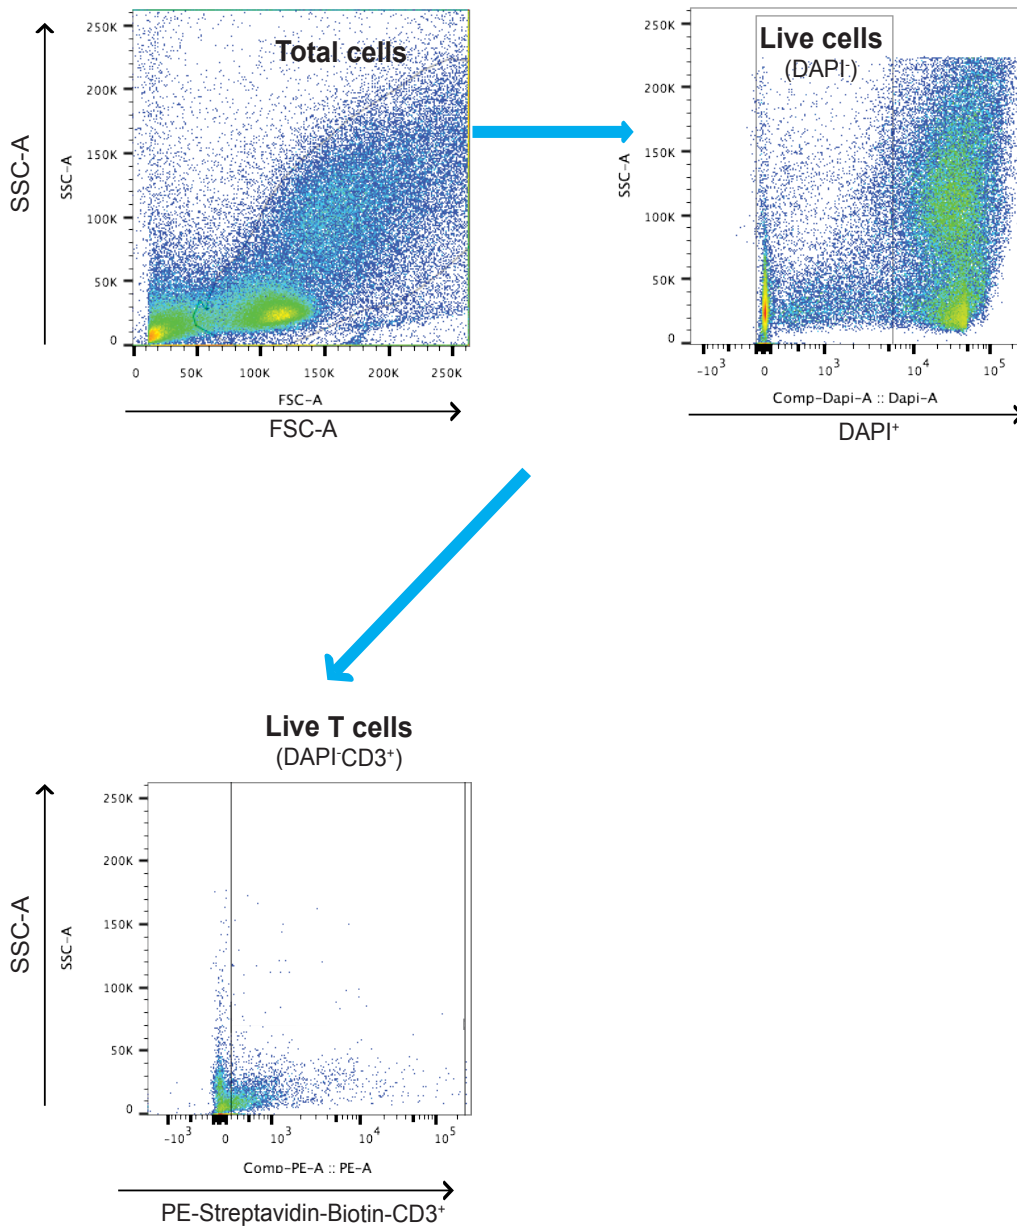

Figure: 7C

**FACS Gating Strategy 5: Macrophage *in vivo* tumour infiltration and activation in Responders vs Non-Responders to APO or CICD**  
Attune NxT (Thermo Fischer Scientific)

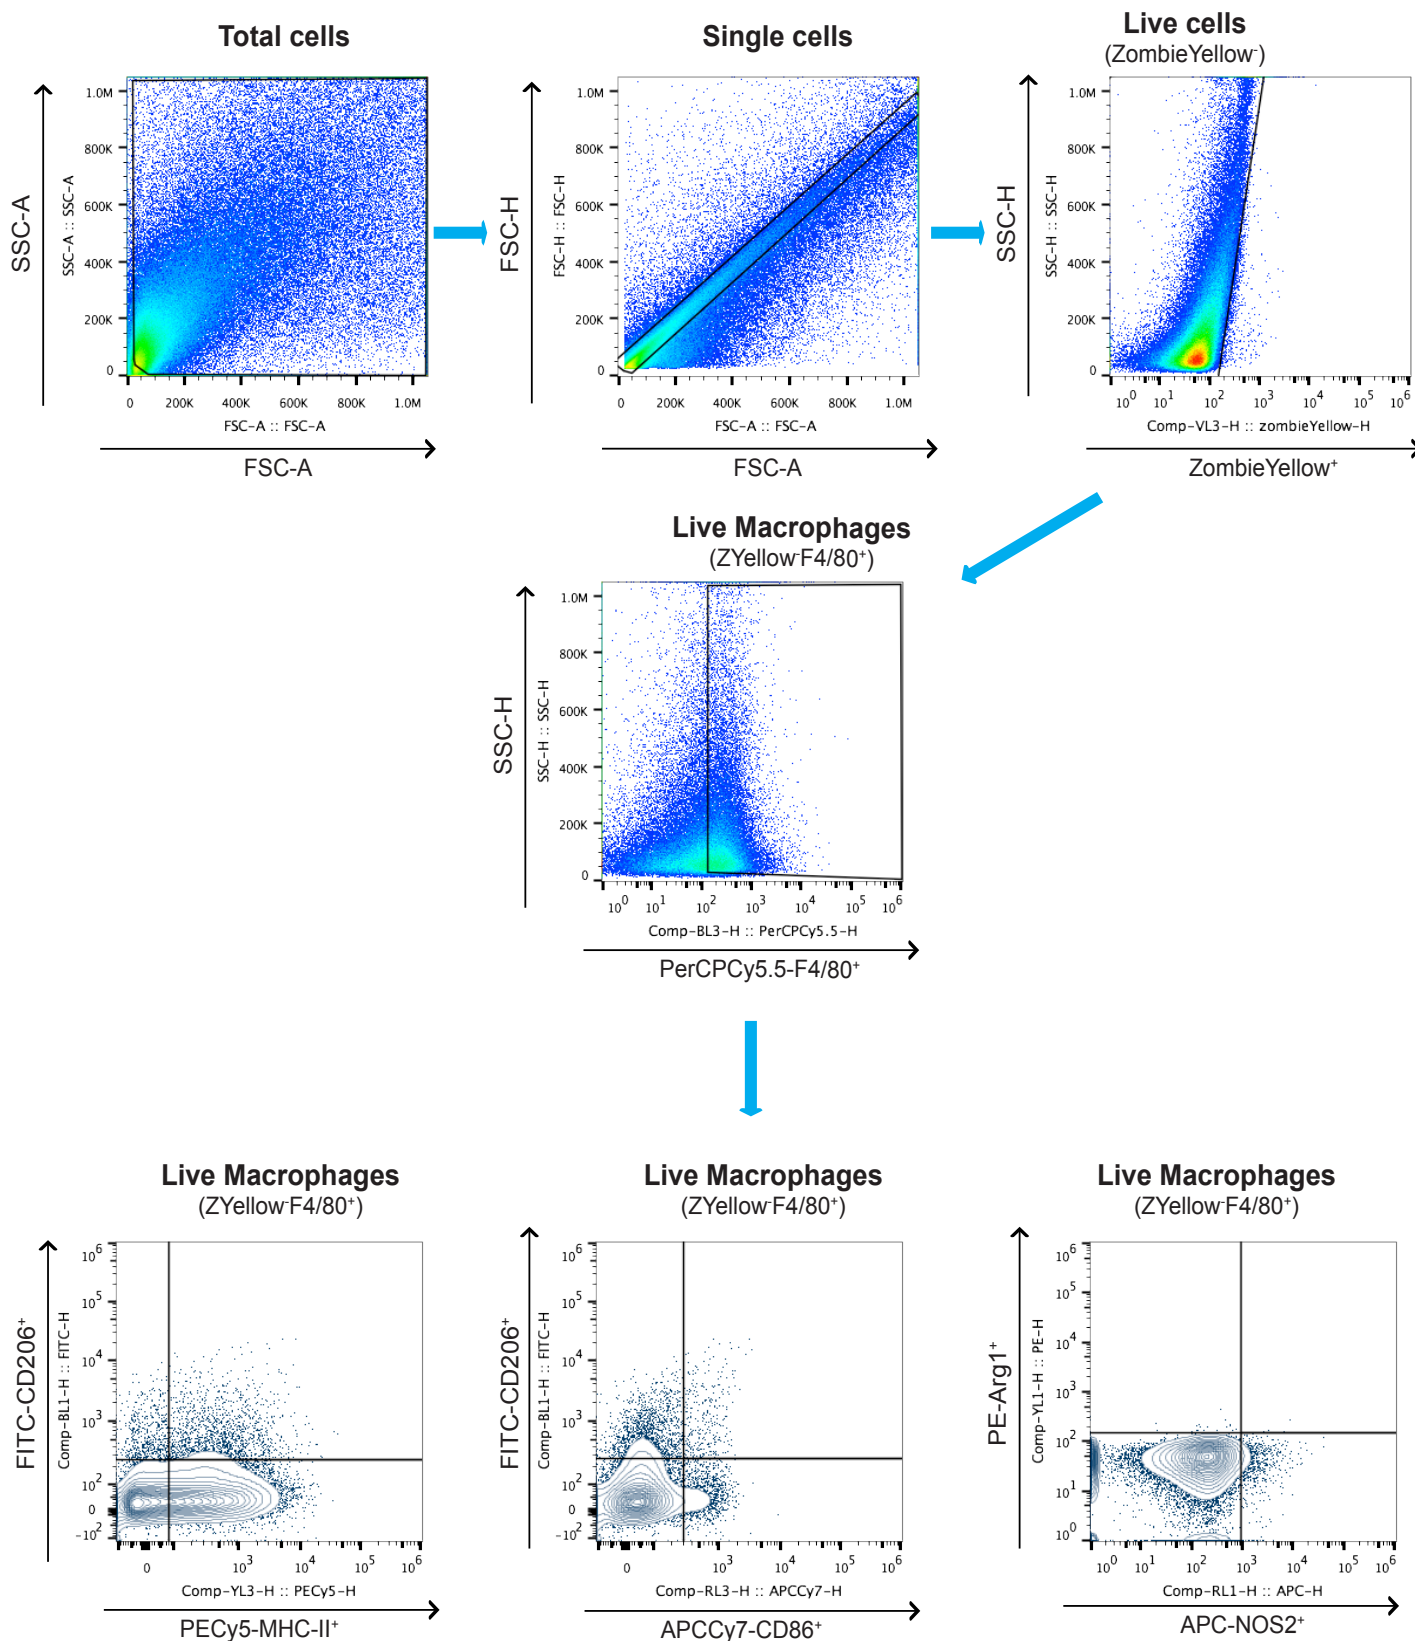

Figures: 8A, S7B

**FACS Gating Strategy 6:** T cell *in vivo* tumour infiltration and activation in Responders vs Non-Responders to APO or CICD Attune NxT (Thermo Fischer Scientific)

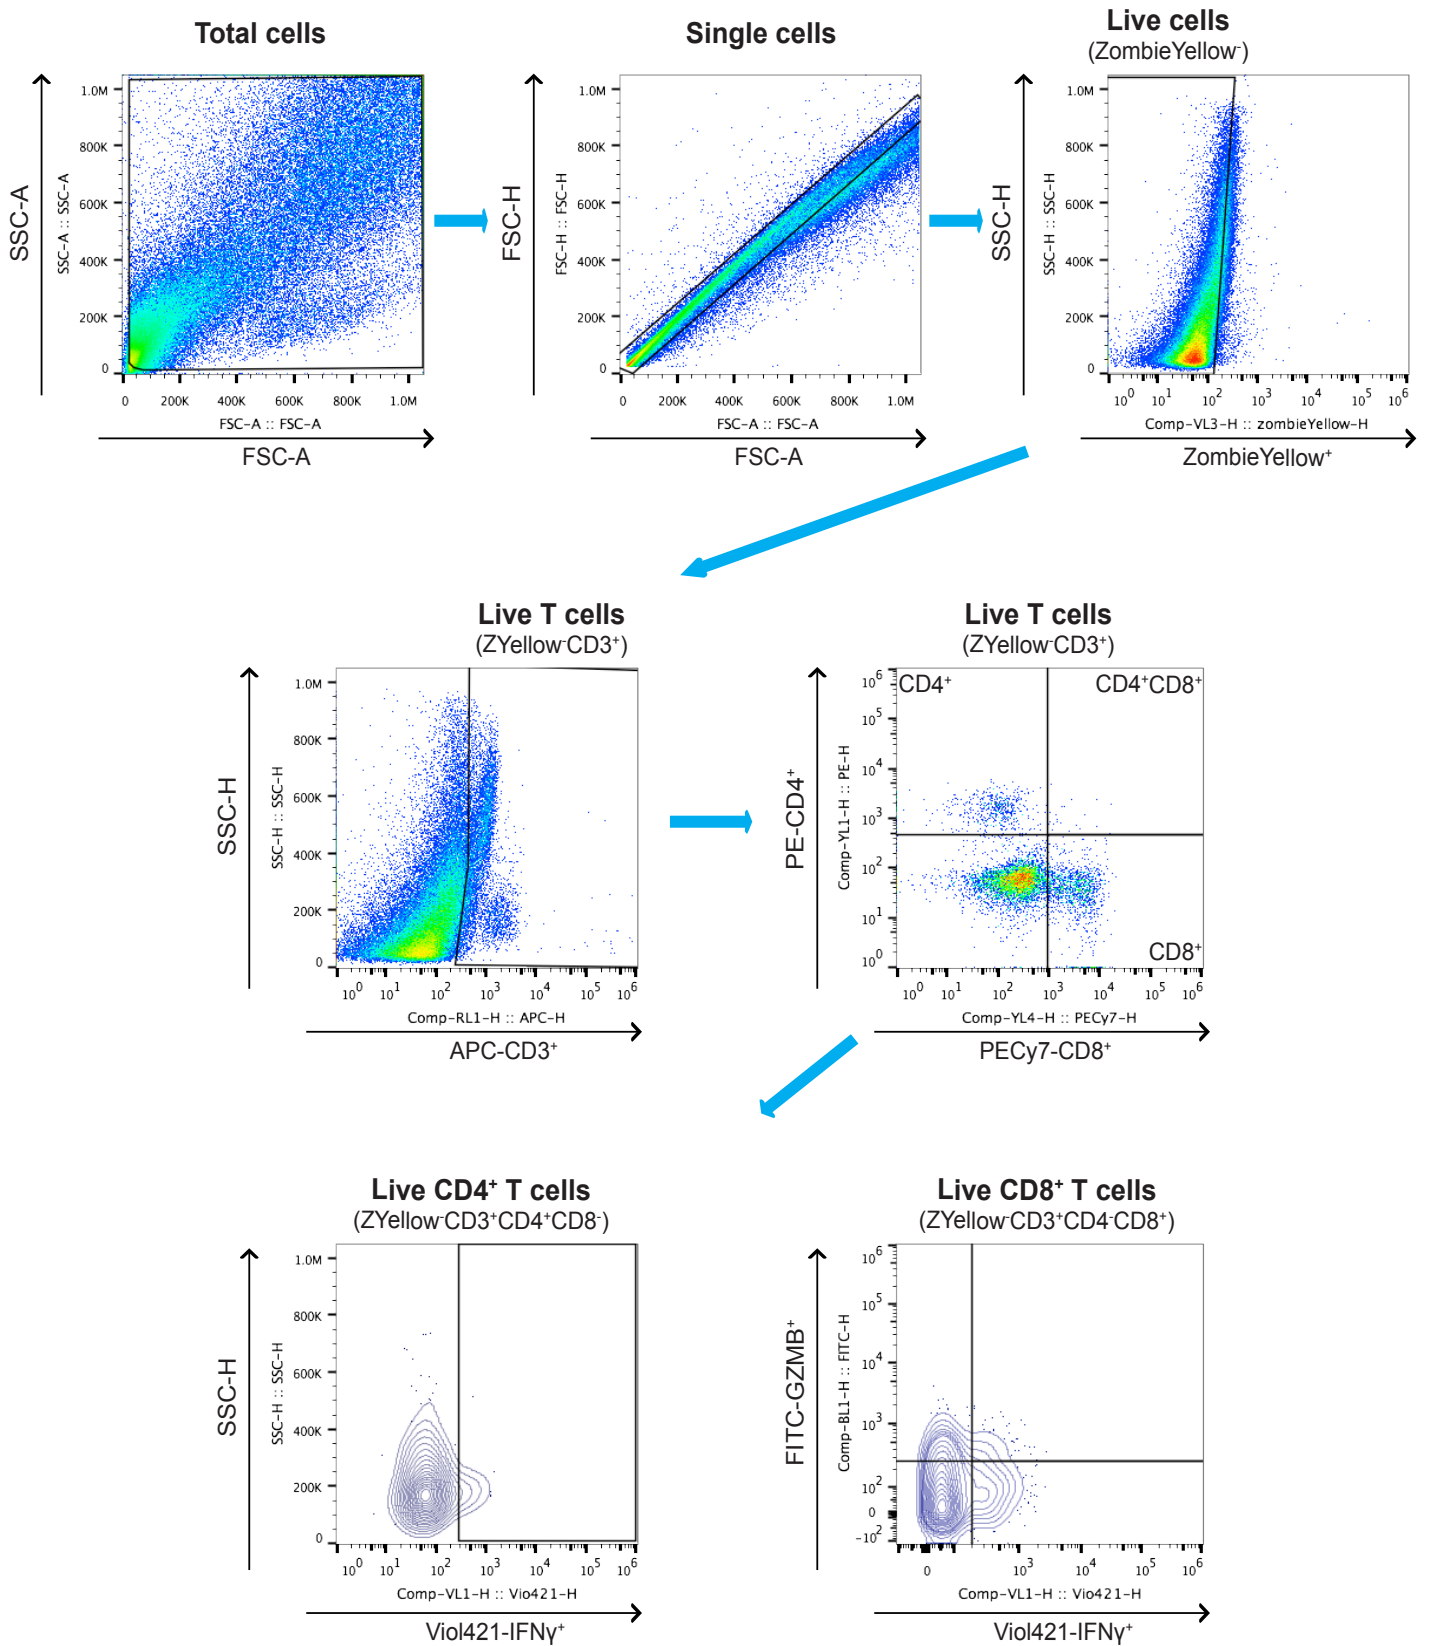

Figures: 8B, 8C,S7C



**FACS Gating Strategy 7: T cell depletion *in vivo* following anti-Thy1.1 treatment**  
 Attune NxT (Thermo Fischer Scientific)

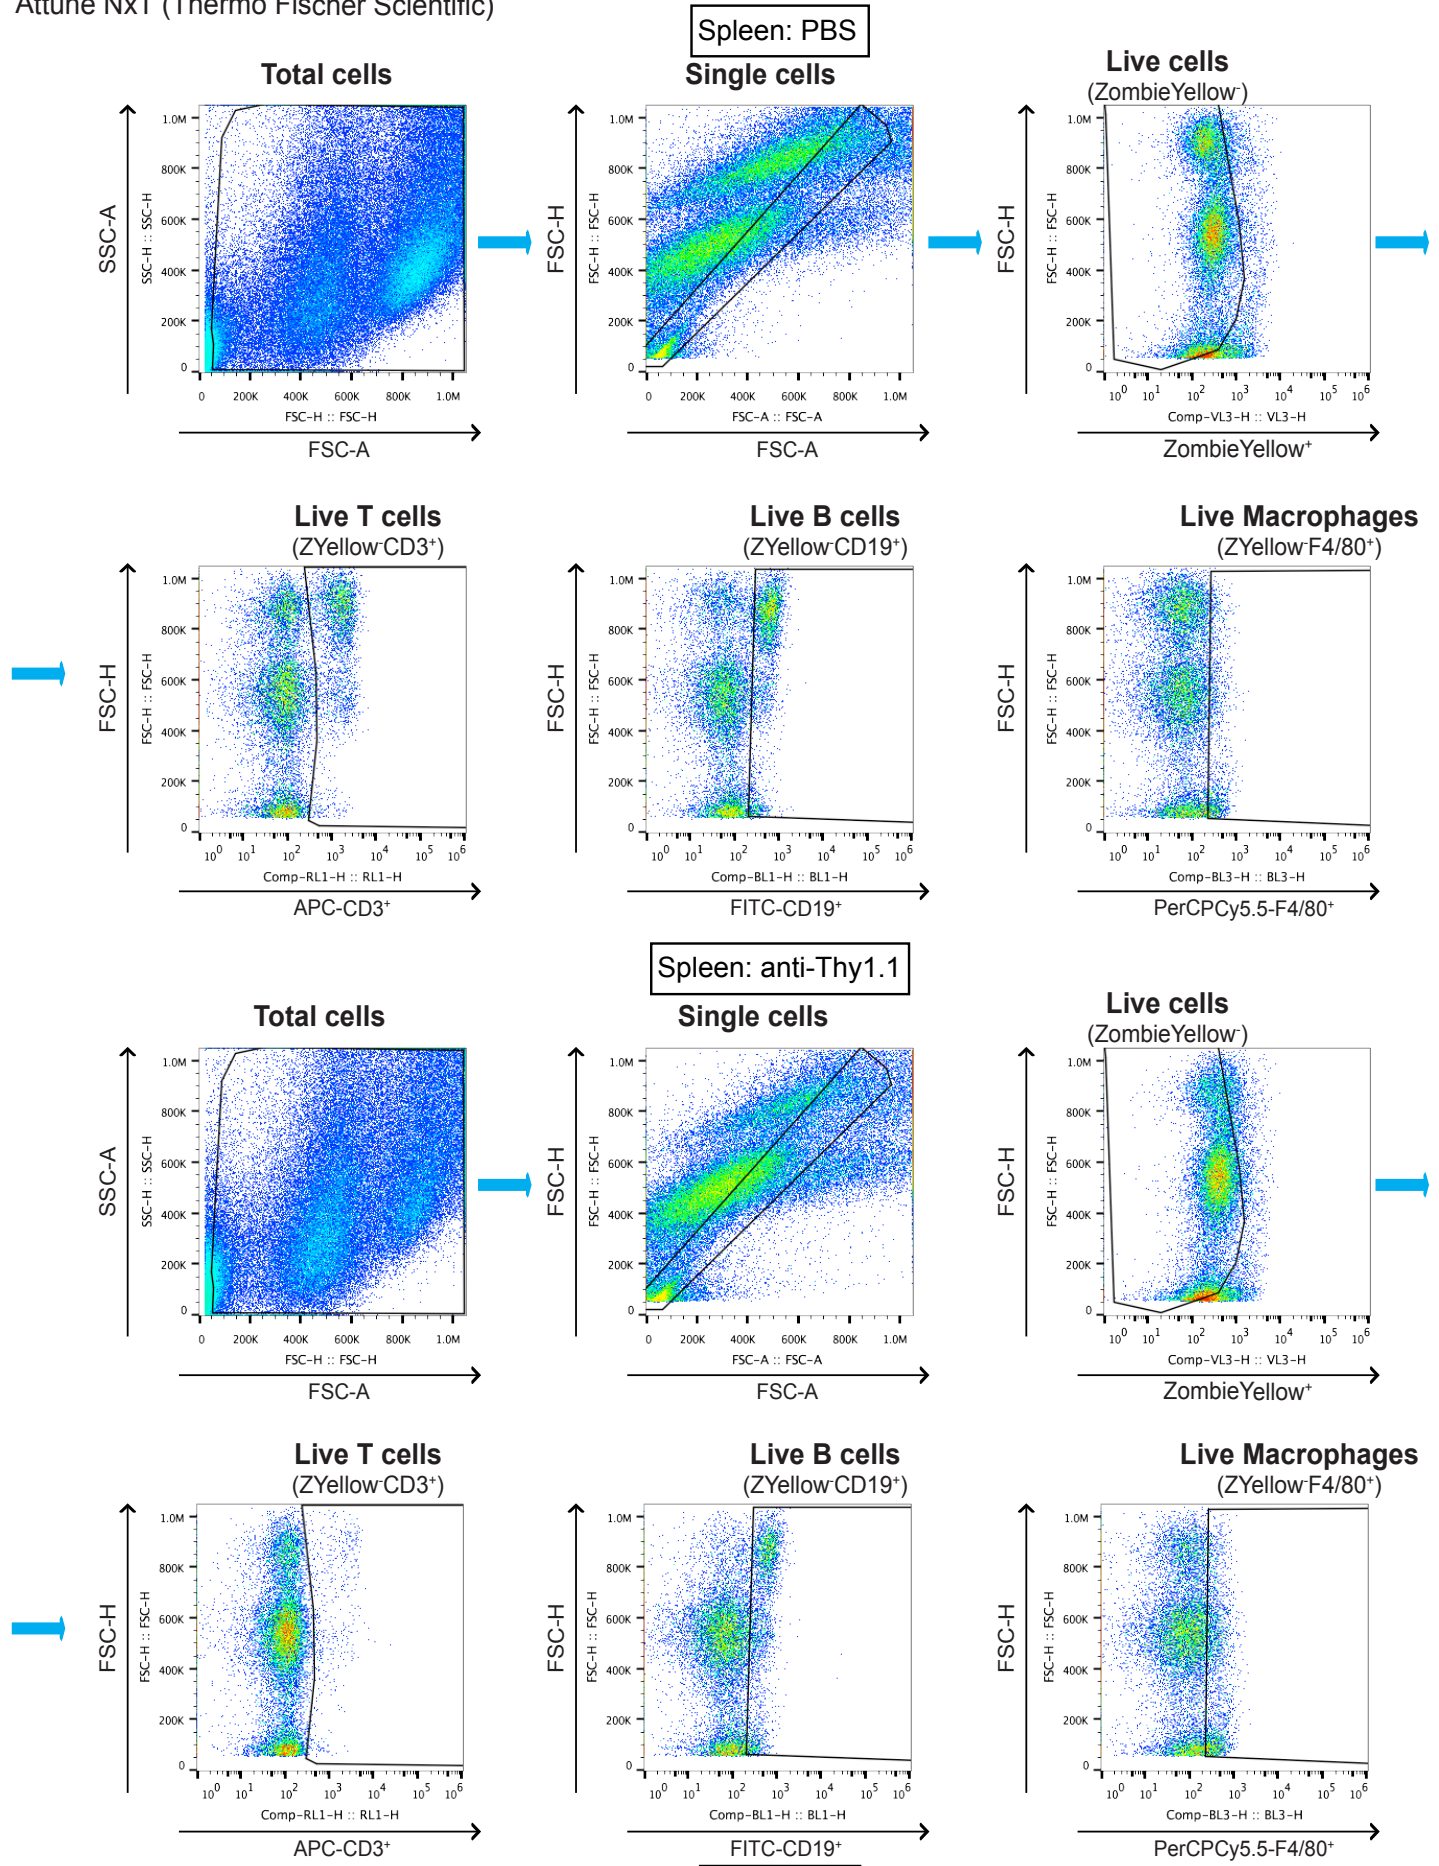

**Figure: S7F**
