# Supplementary material
Source: PubMed Central journal article supplement (PMC5624512)

# Supplemental Figure 1

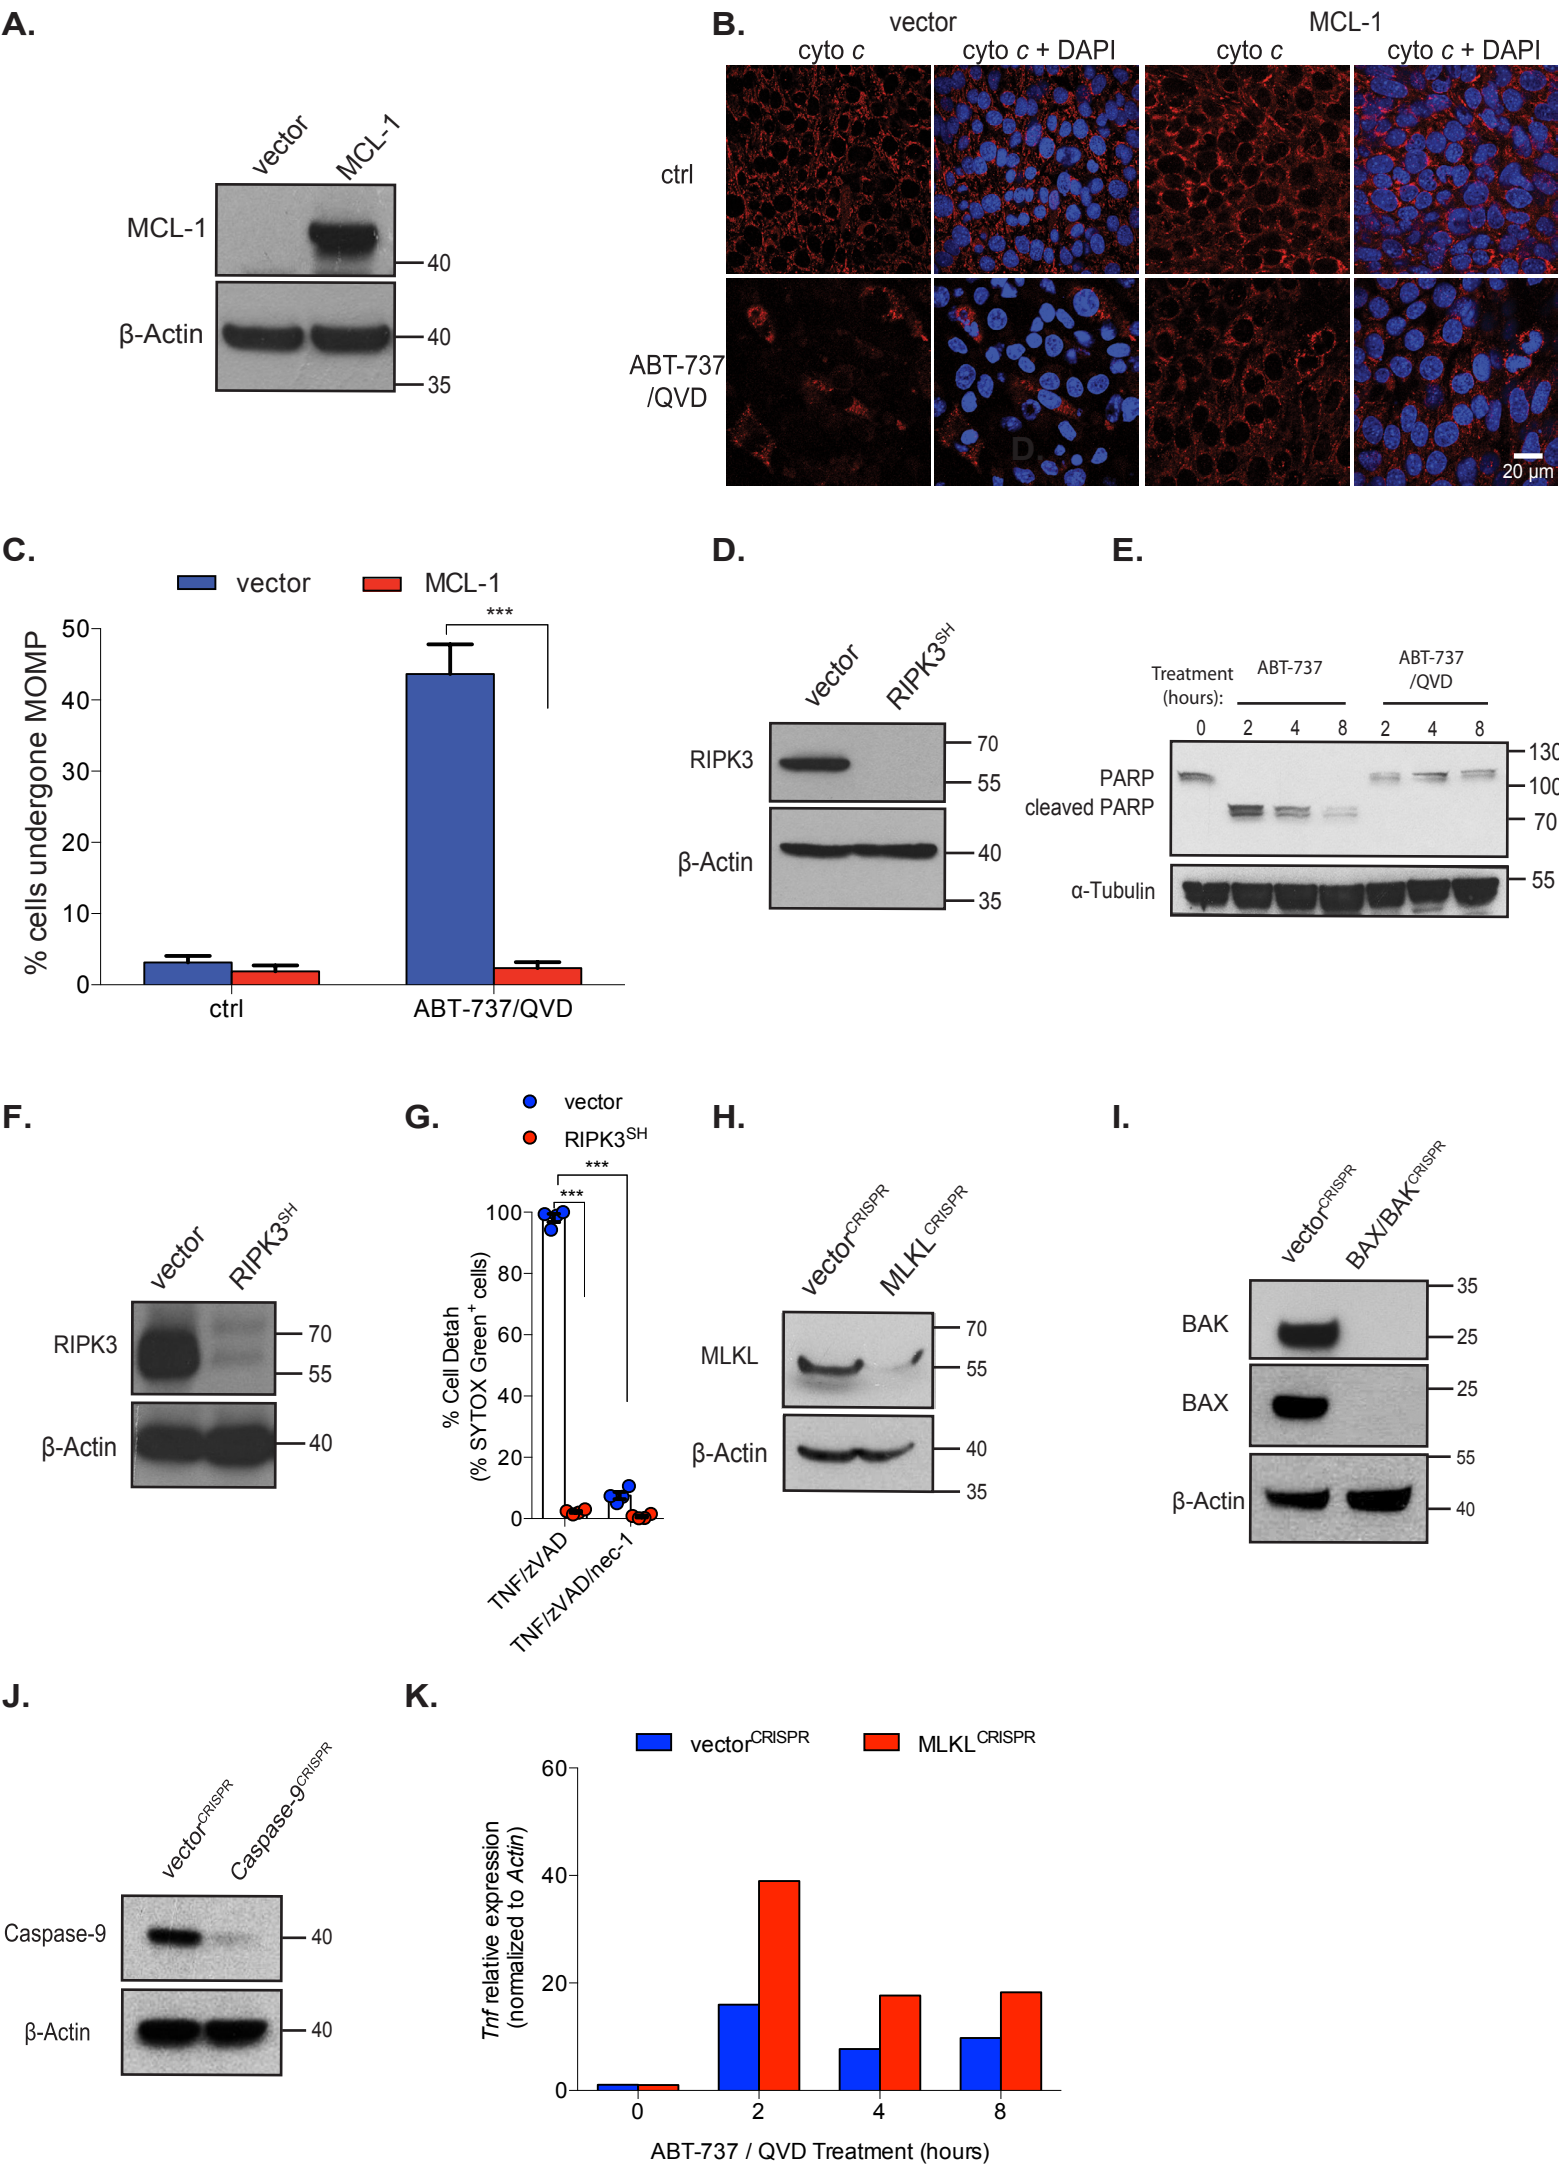

Supplement: NIHMS73487-supplement-Supplementary_figure_1.pdf [file NIHMS73487-supplement-Supplementary_figure_1.pdf]

# Supplemental Figure 2

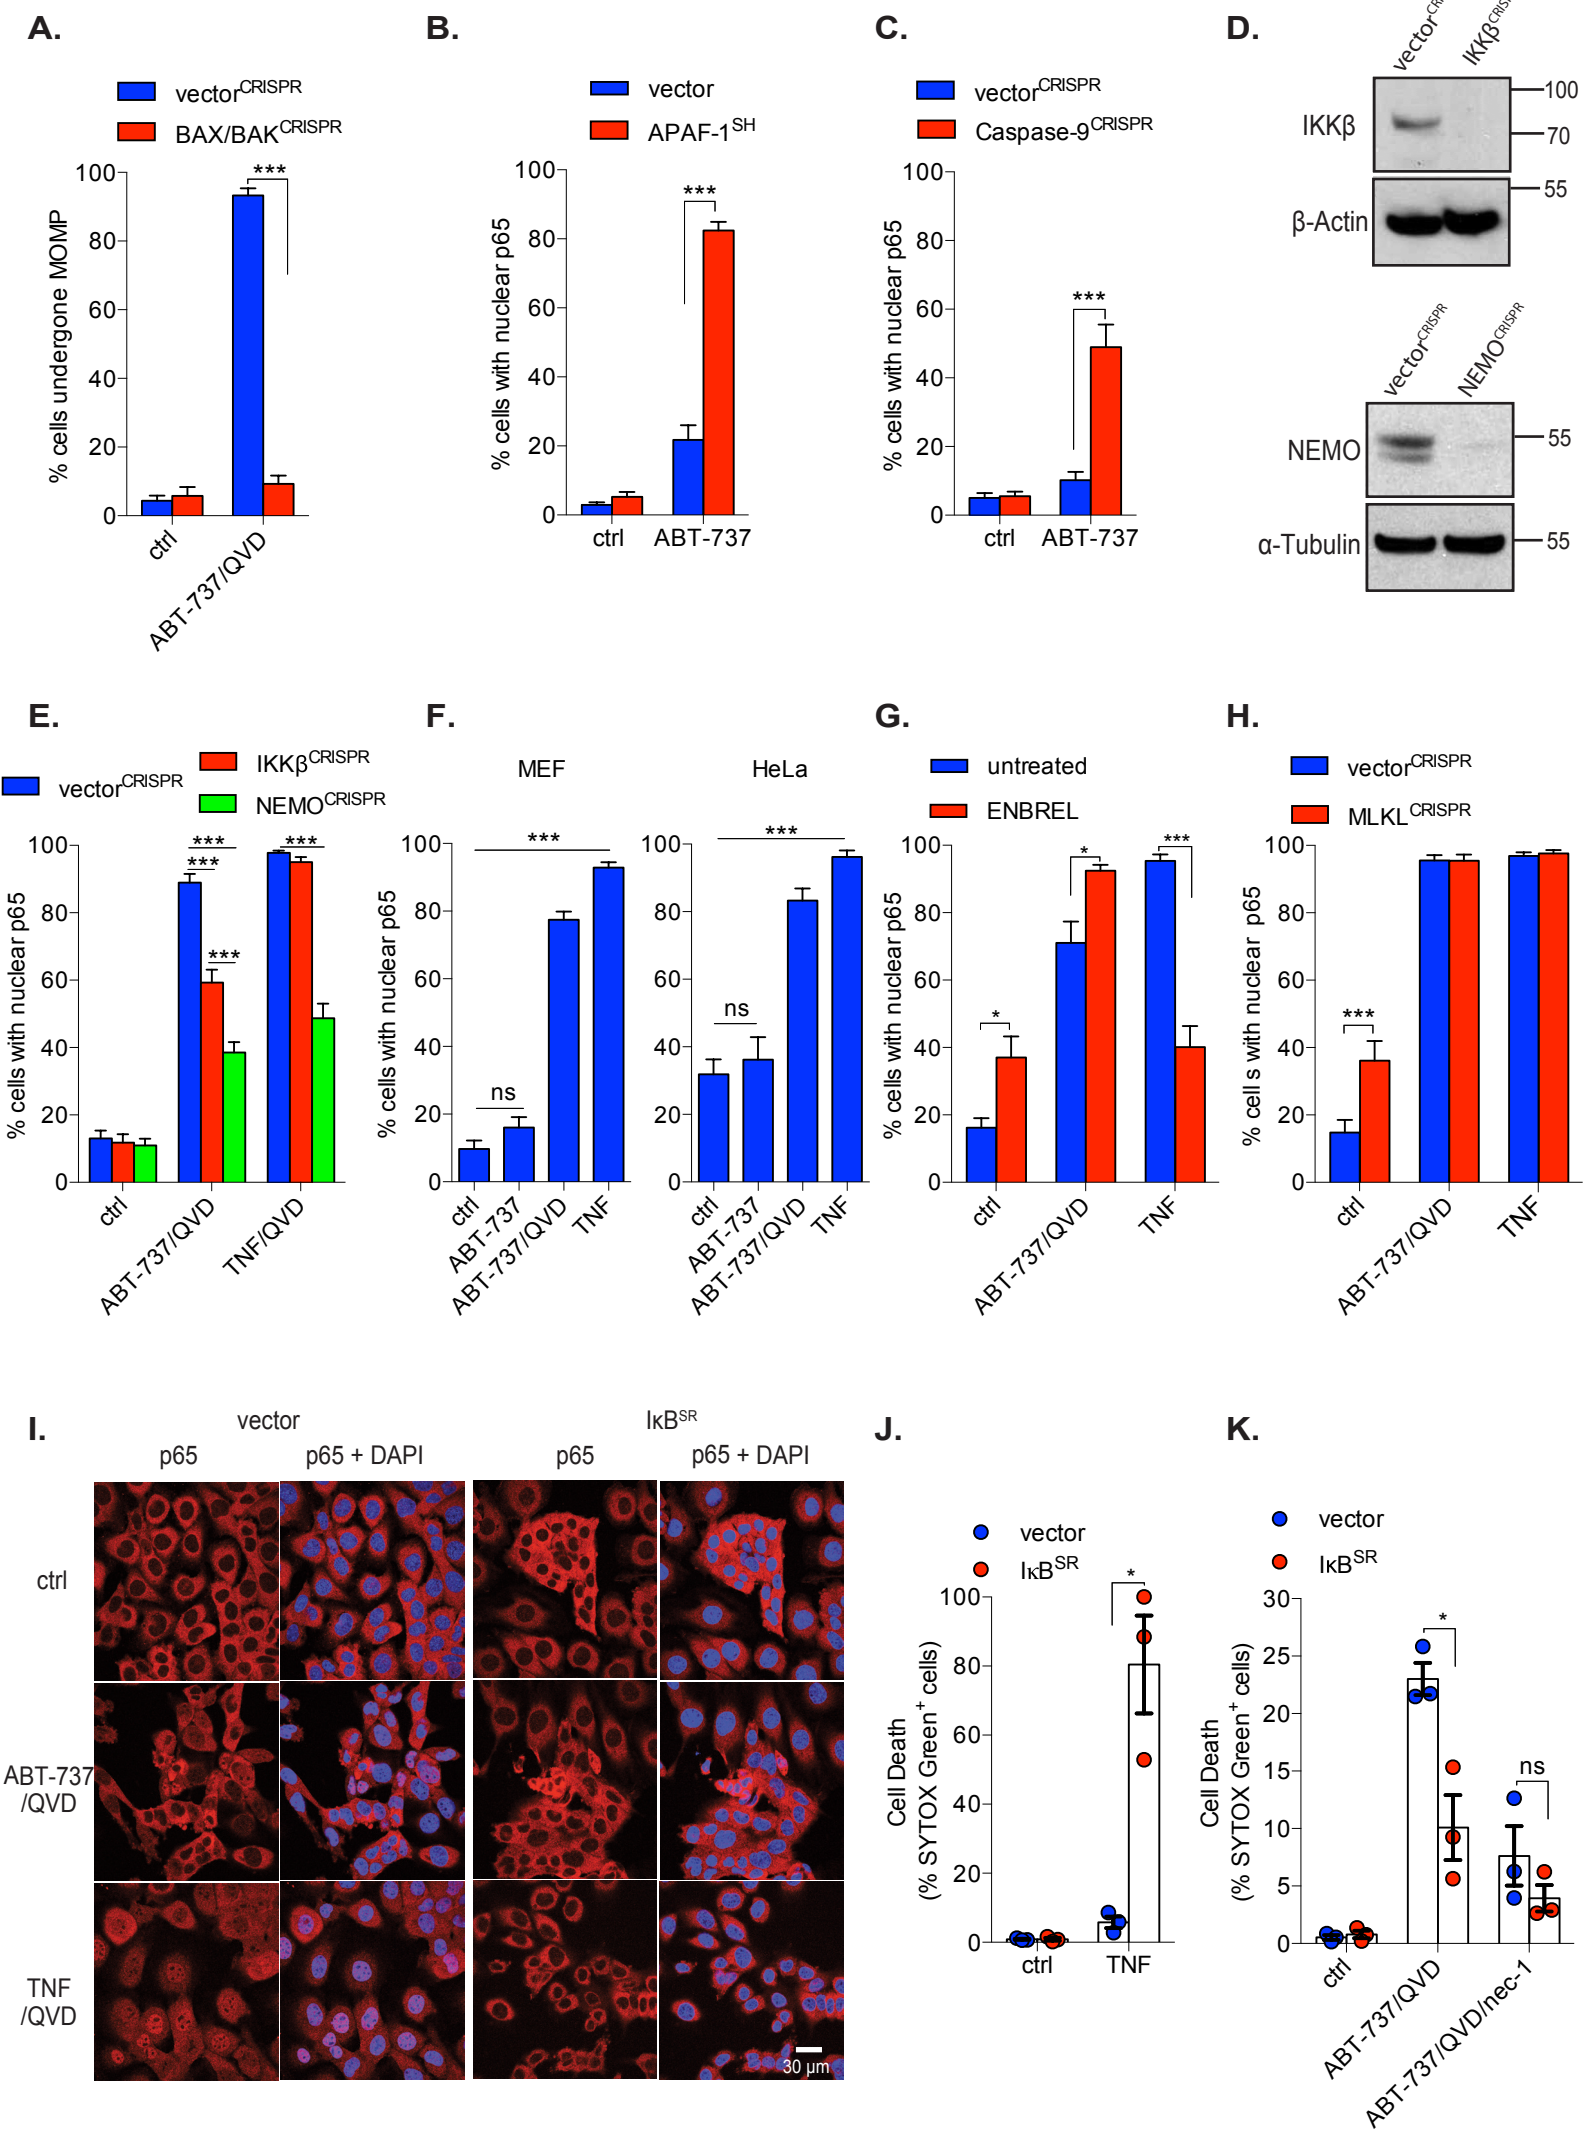

Supplement: NIHMS73487-supplement-Supplementary_figure_2.pdf [file NIHMS73487-supplement-Supplementary_figure_2.pdf]

# Supplemental Figure 3

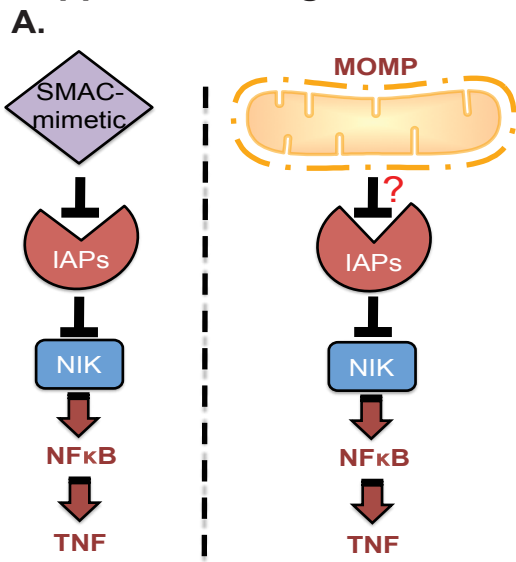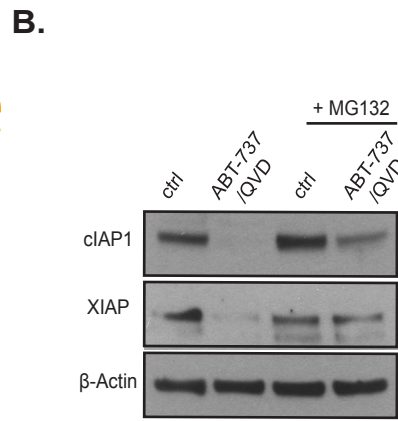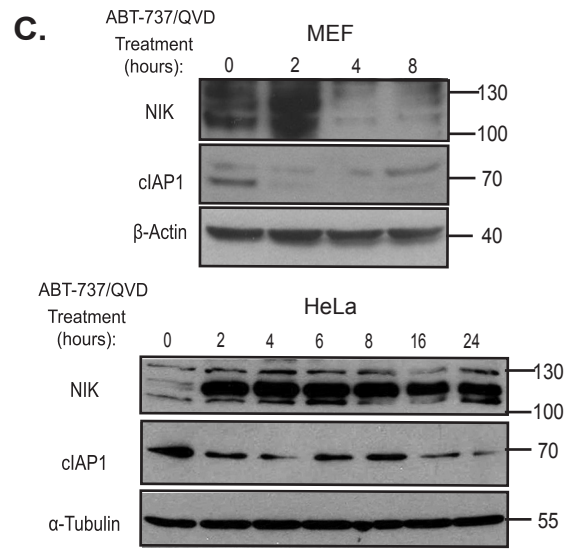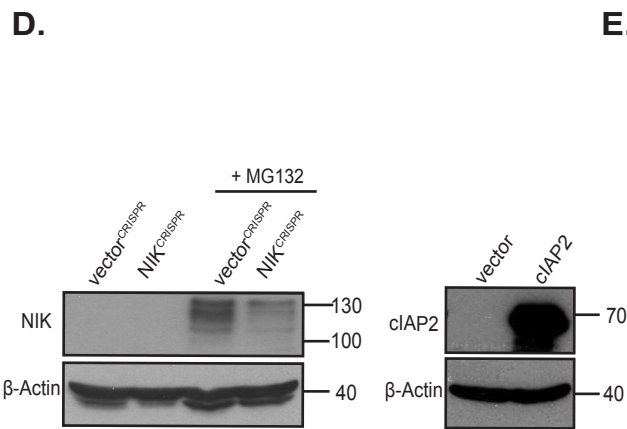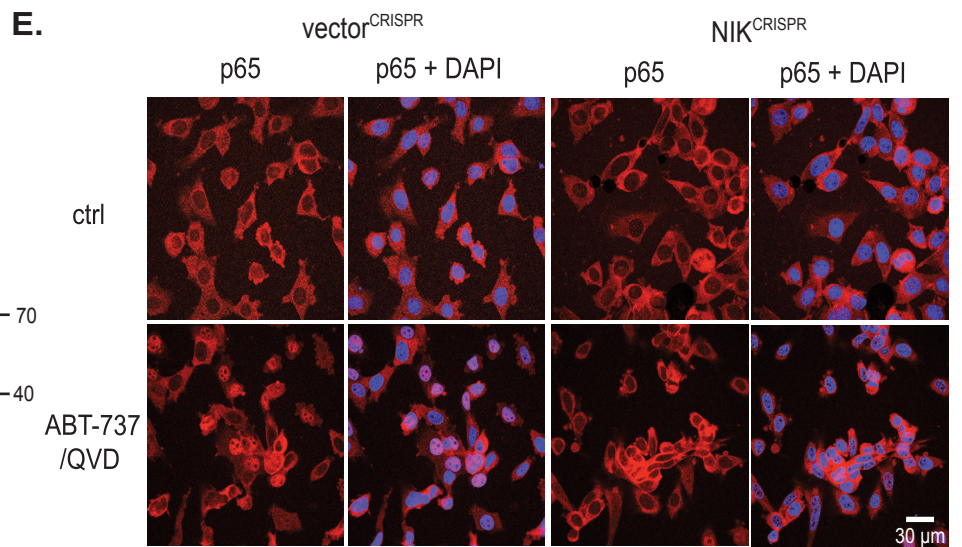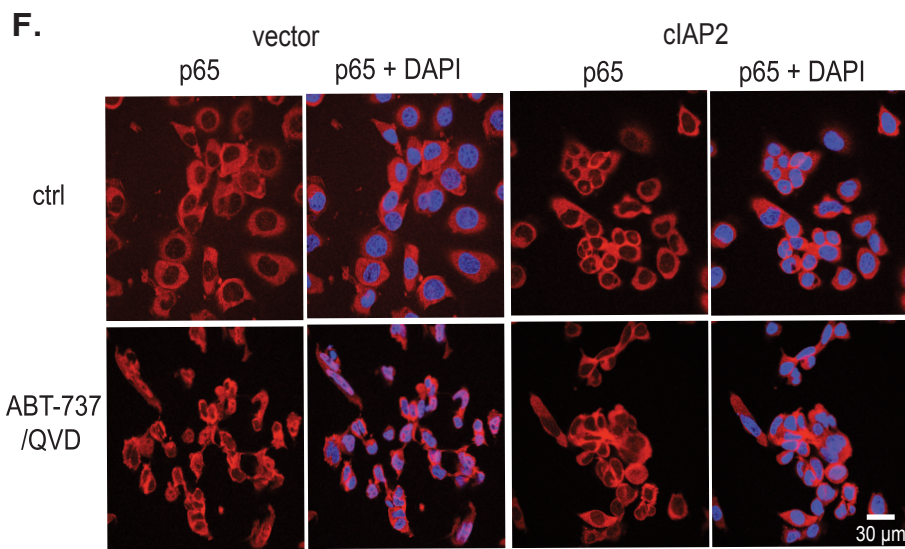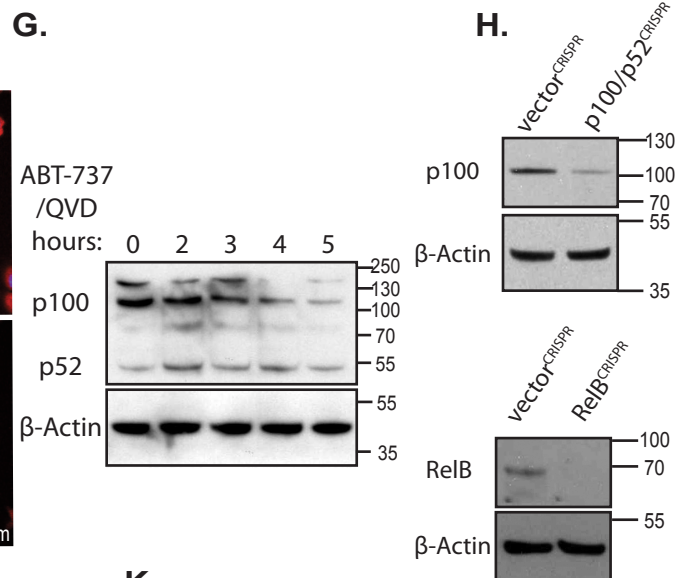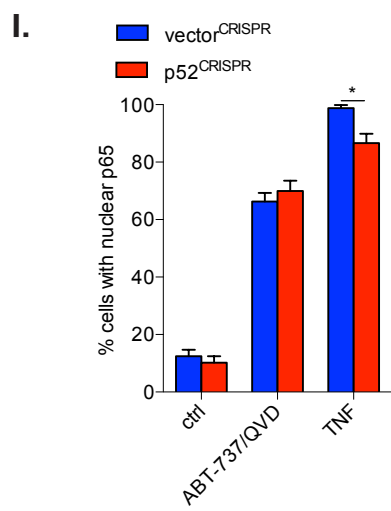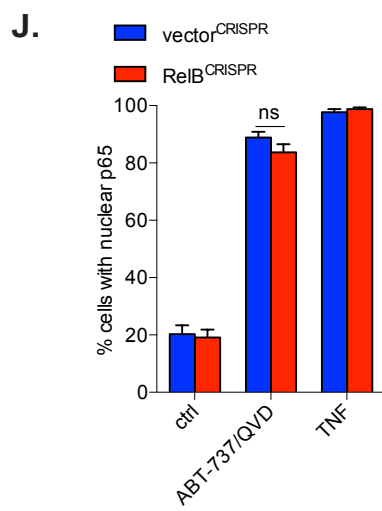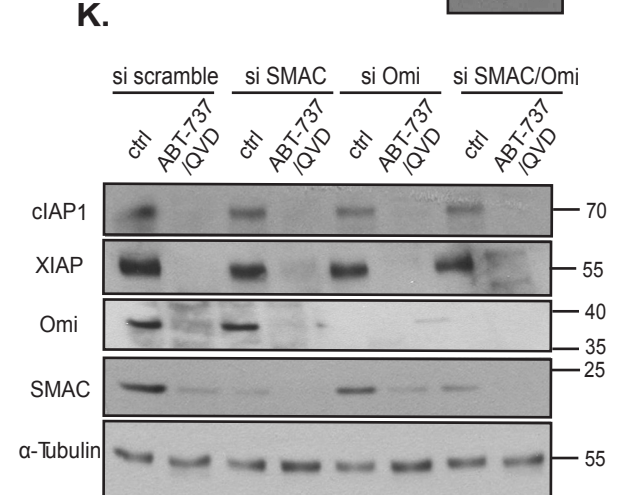

Supplement: NIHMS73487-supplement-Supplementary_figure_3.pdf [file NIHMS73487-supplement-Supplementary_figure_3.pdf]

# Supplemental Figure 4

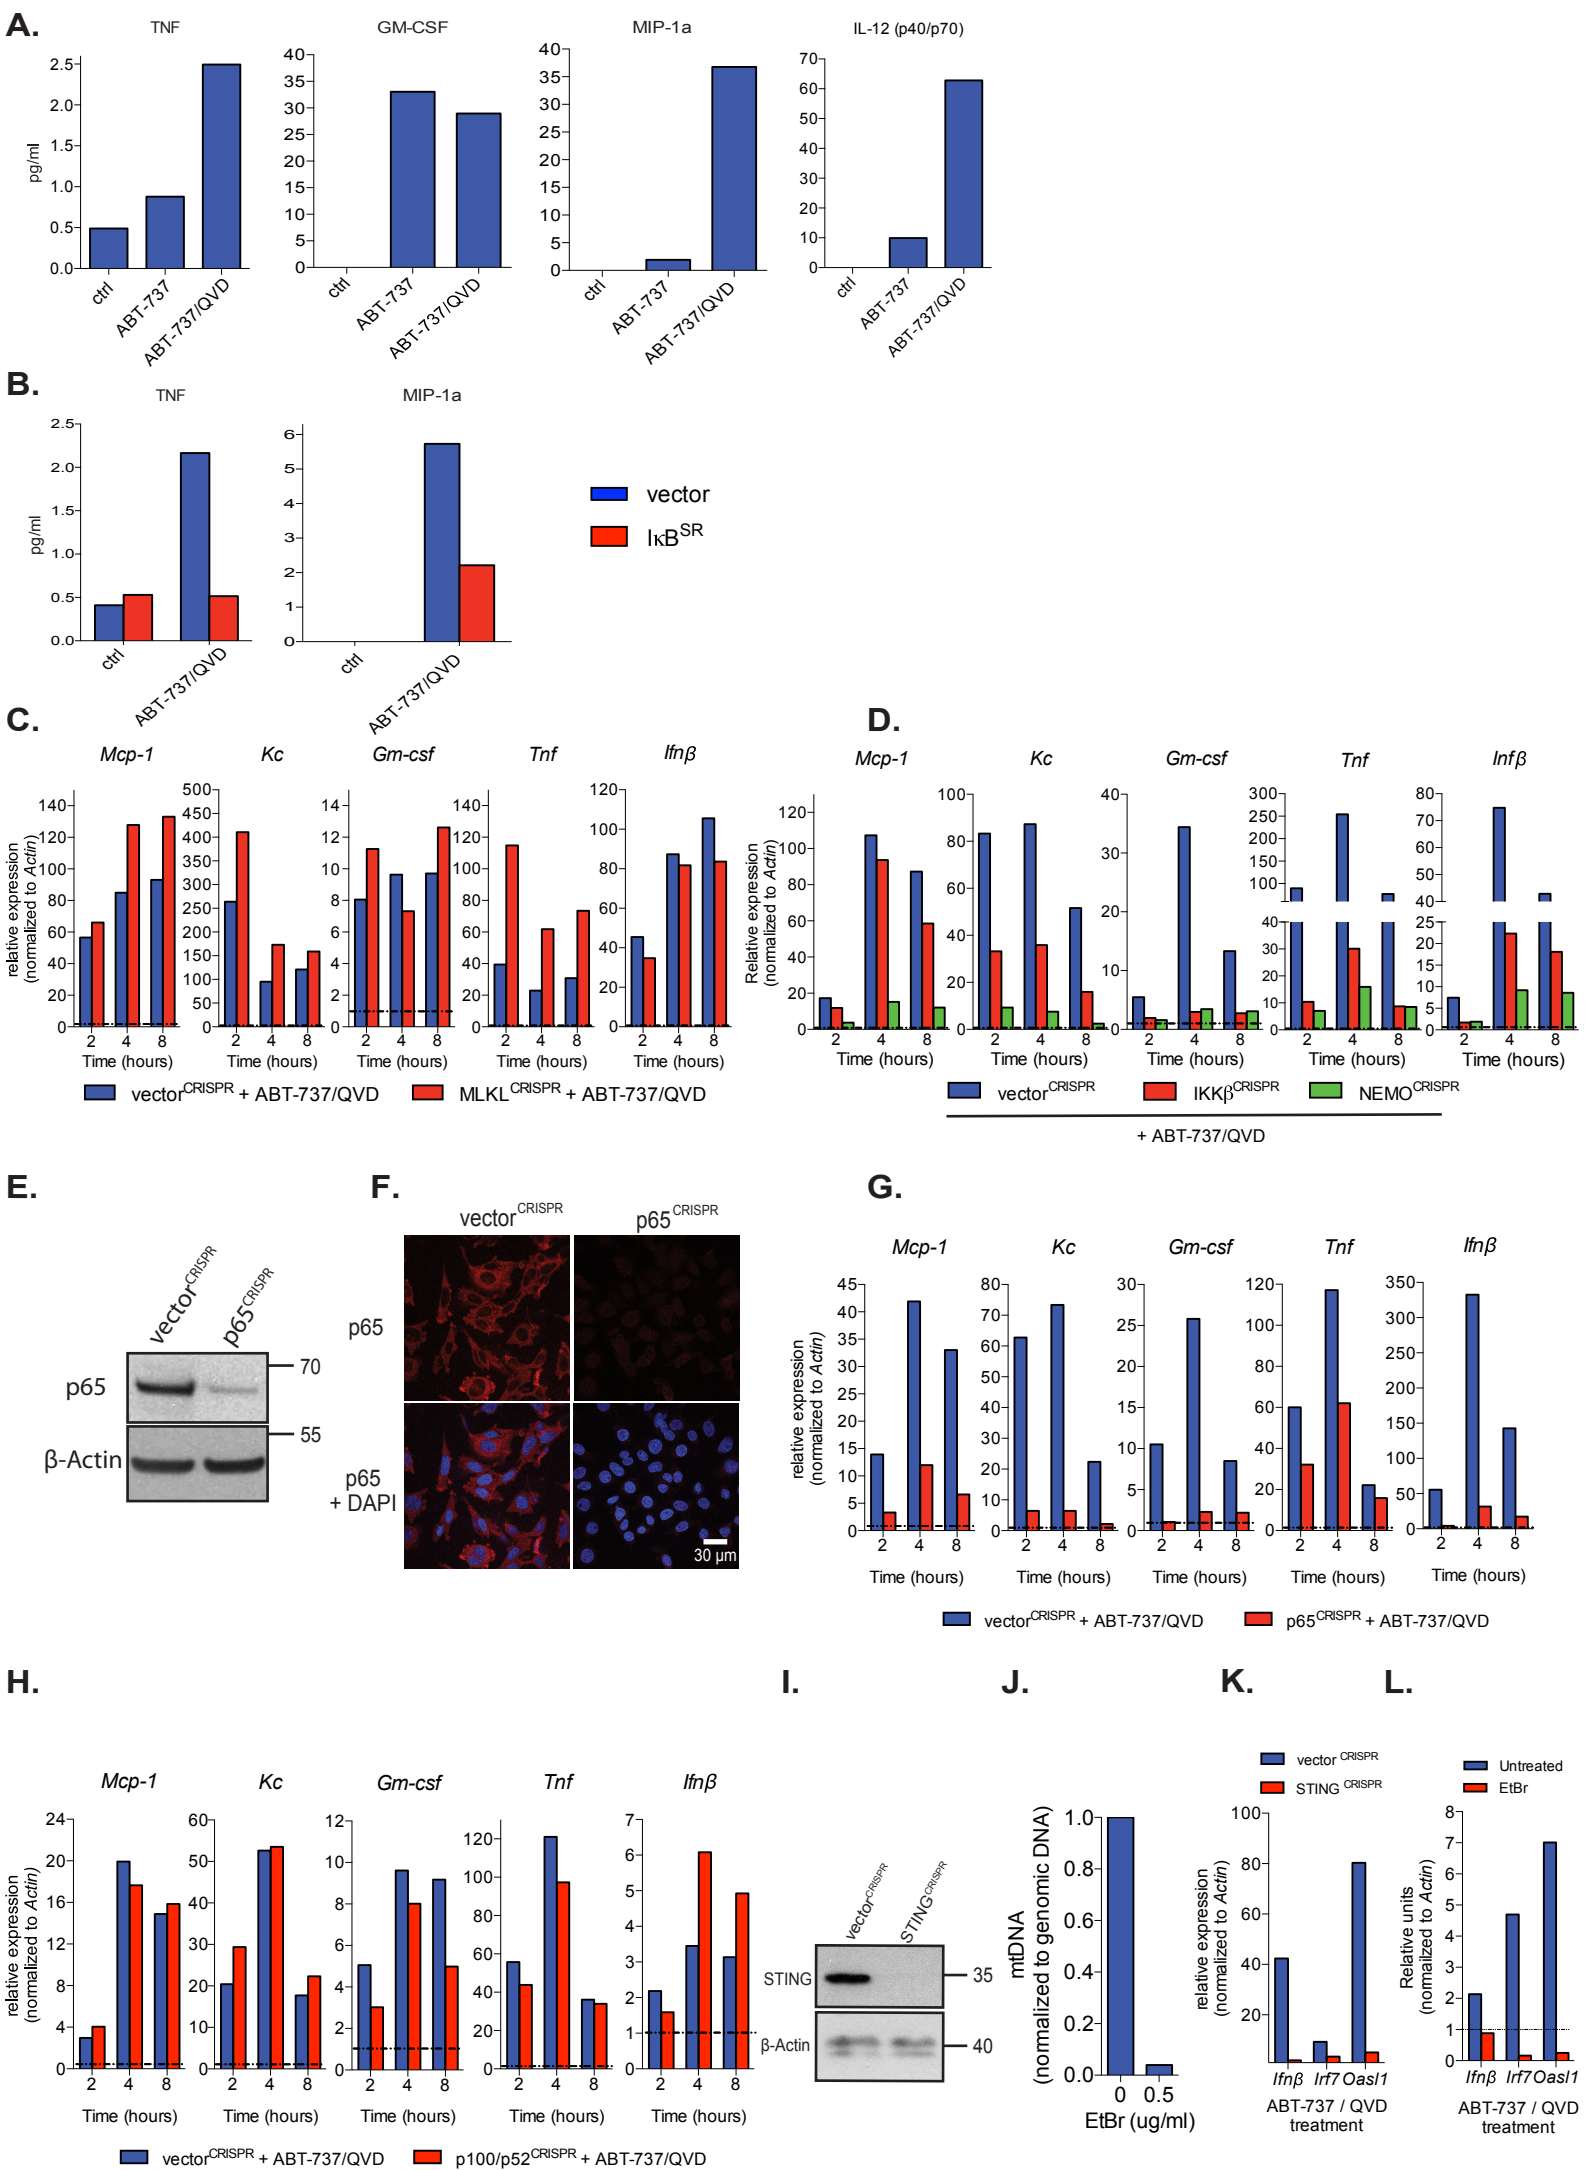

Supplement: NIHMS73487-supplement-Supplementary_figure_4.pdf [file NIHMS73487-supplement-Supplementary_figure_4.pdf]

# Supplemental Figure 5

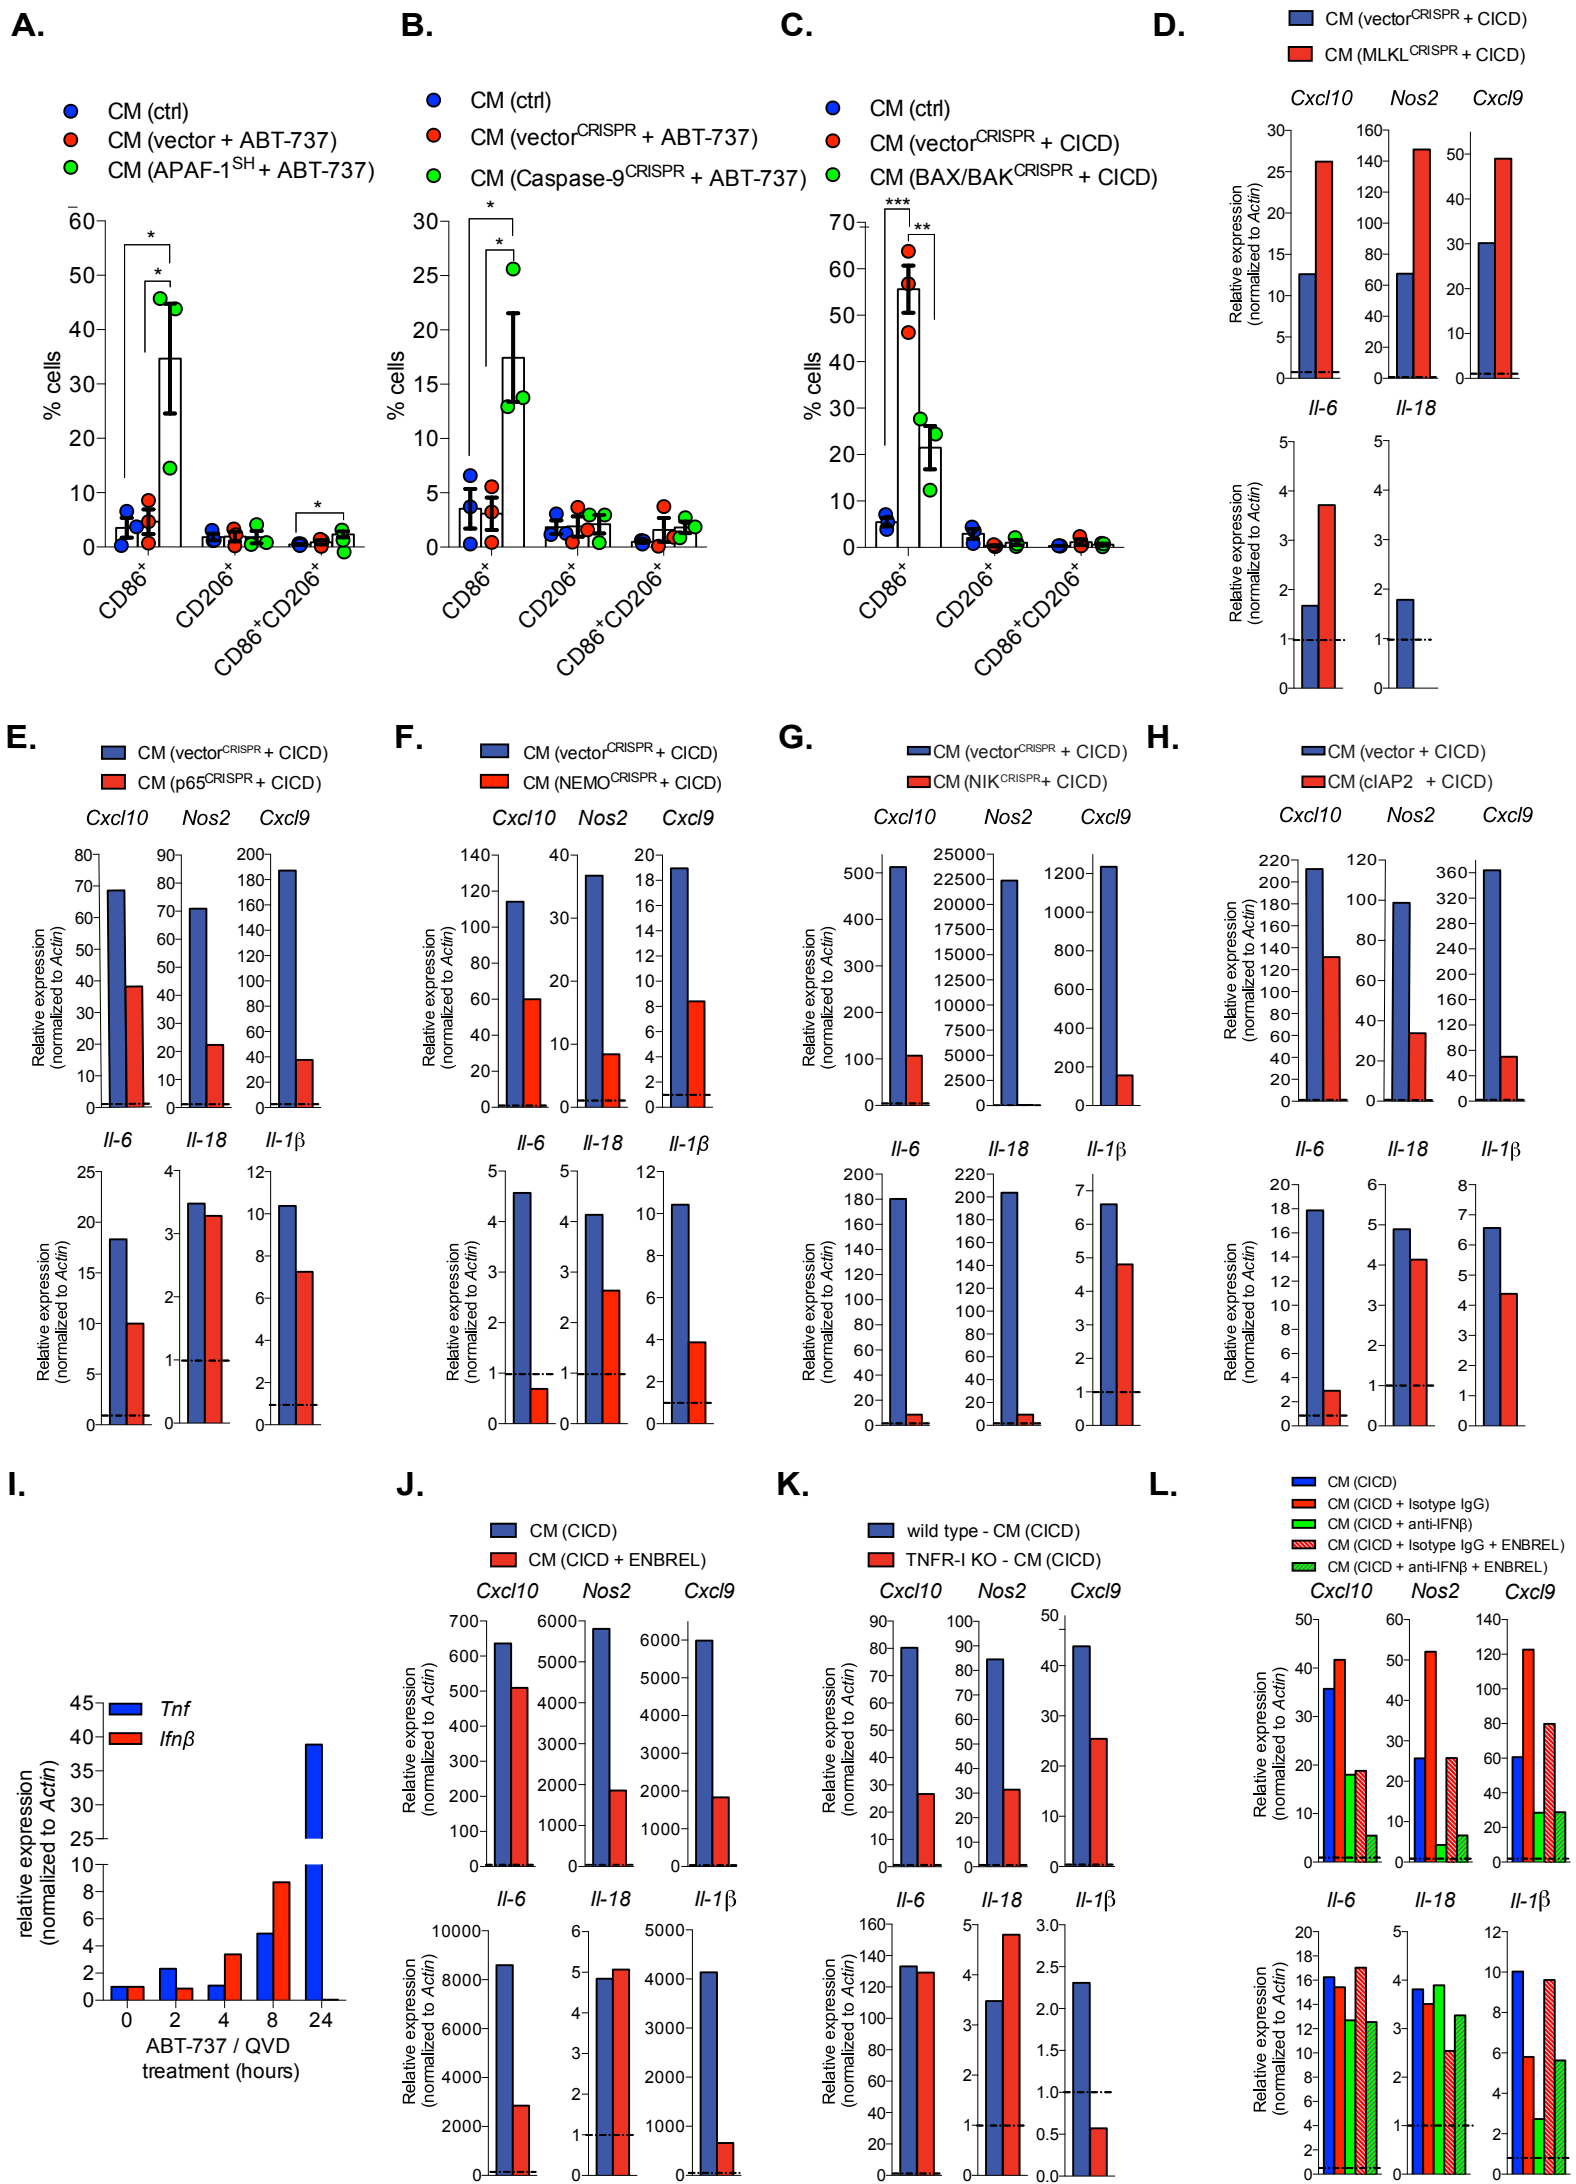

Supplement: NIHMS73487-supplement-Supplementary_figure_5.pdf [file NIHMS73487-supplement-Supplementary_figure_5.pdf]

# Supplemental Figure 6:

**A.**

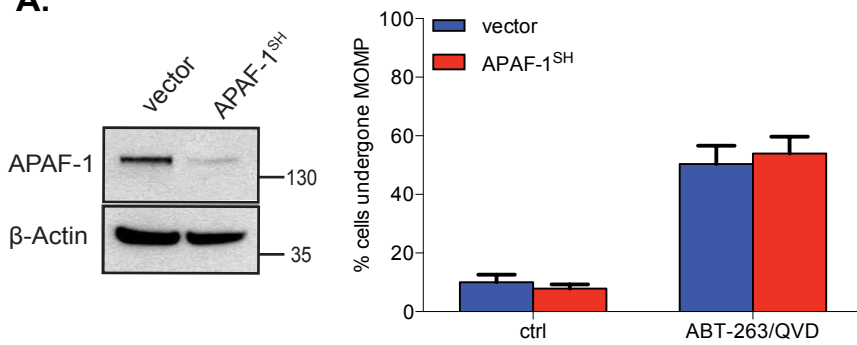

**B.**

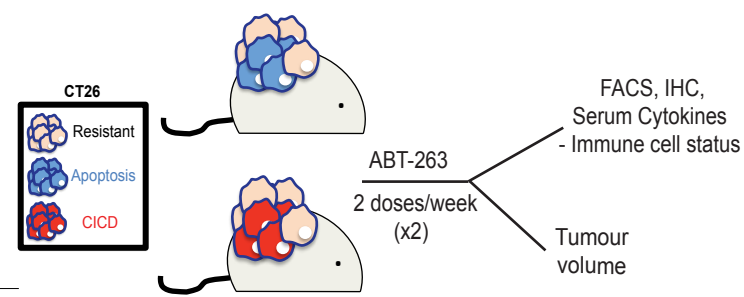

**C.**

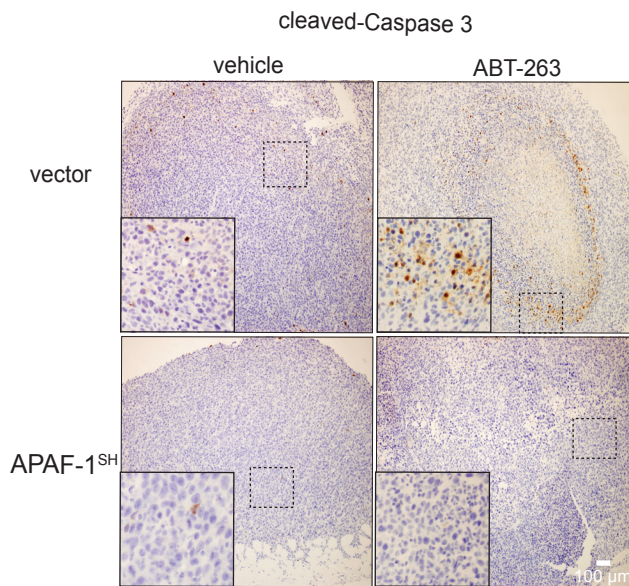

**D.**

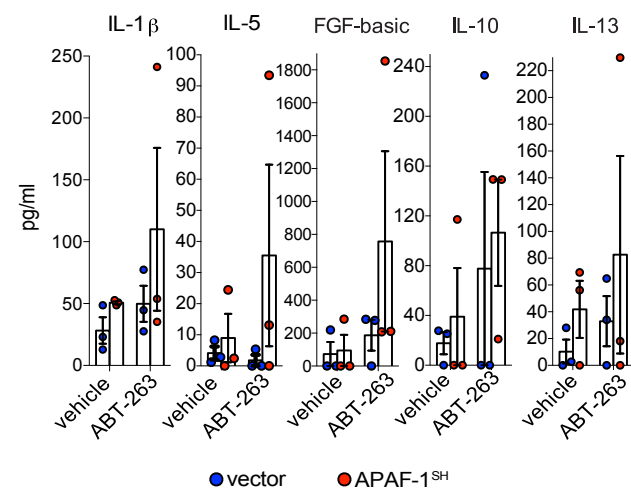

**E.**

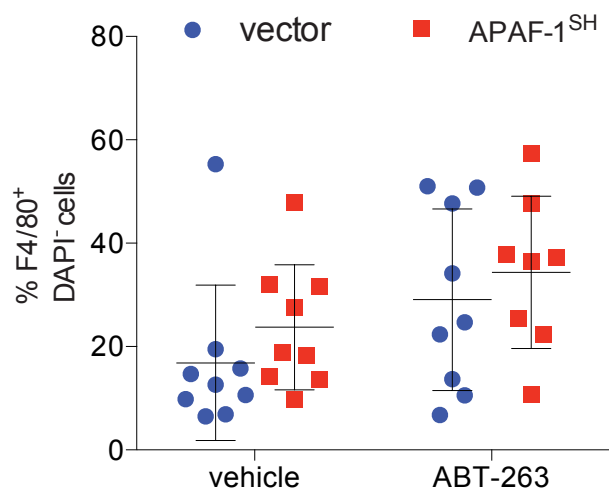

**F.**

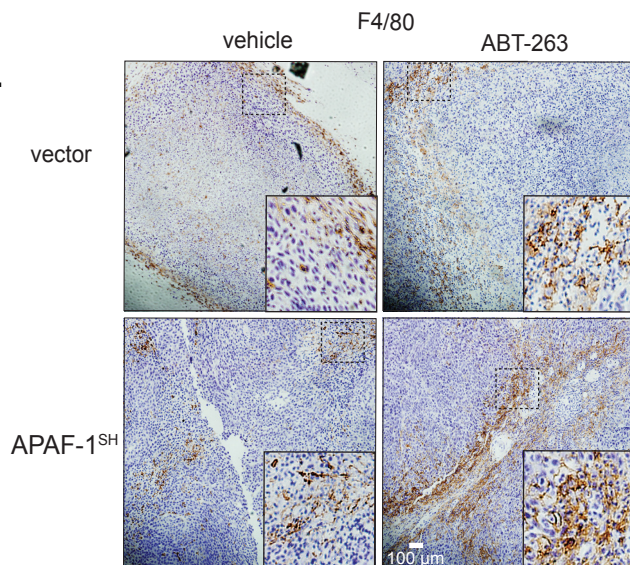

**G.**

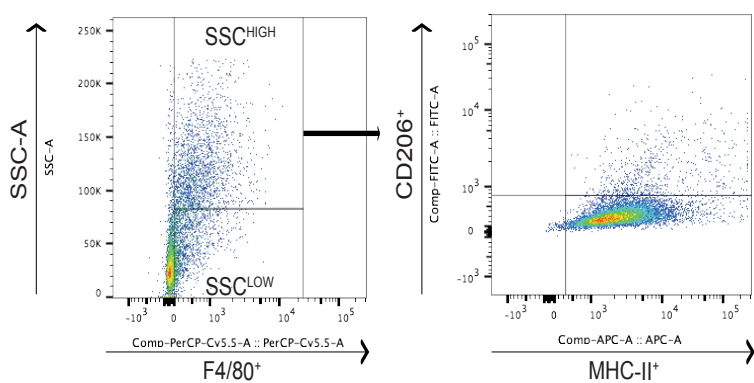

**H.**

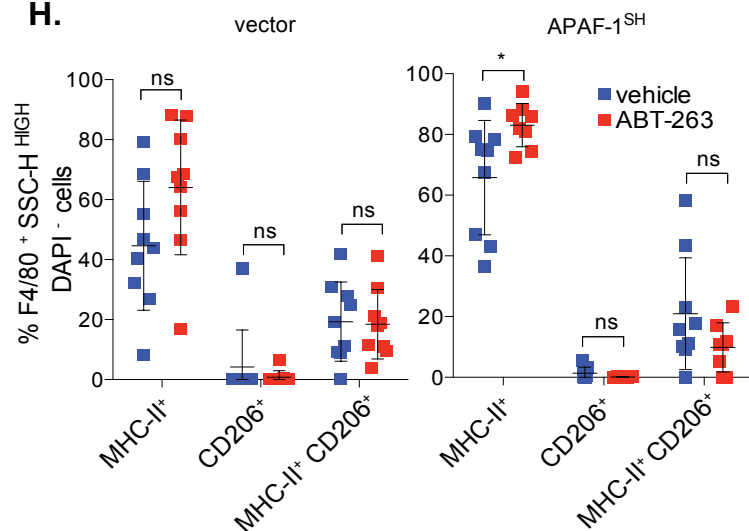

Supplement: NIHMS73487-supplement-Supplementary_figure_6.pdf [file NIHMS73487-supplement-Supplementary_figure_6.pdf]
